# Supplementary material for: Effects of e-learning in a continuing education context on nursing care: a review of systematic qualitative, quantitative and mixed studies reviews (protocol)
Source: PubMed Central journal article supplement — BMJ Open. 2017 Oct 16;7(10):e018441. doi: 10.1136/bmjopen-2017-018441 (PMC5652594; doi:10.1136/bmjopen-2017-018441), 2017-10-16
Supplement: bmjopen-2017-018441.draft_revisions.pdf [file bmjopen-2017-018441.draft_revisions.pdf]

# BMJ Open

BMJ Open is committed to open peer review. As part of this commitment we make the peer review history of every article we publish publicly available.

When an article is published we post the peer reviewers' comments and the authors' responses online. We also post the versions of the paper that were used during peer review. These are the versions that the peer review comments apply to.

The versions of the paper that follow are the versions that were submitted during the peer review process. They are not the versions of record or the final published versions. They should not be cited or distributed as the published version of this manuscript.

BMJ Open is an open access journal and the full, final, typeset and author-corrected version of record of the manuscript is available on our site with no access controls, subscription charges or pay-per-view fees (<http://bmjopen.bmj.com>).

If you have any questions on BMJ Open's open peer review process please email [editorial.bmjopen@bmj.com](mailto:editorial.bmjopen@bmj.com)

# BMJ Open

## Effects of e-learning in a continuing education context on nursing care: an overview of systematic mixed studies reviews (protocol)

|                                 |                                                                                                                                                                                                                                                                                                                                                                                                                                                                                                                                                                                                                                                                                                                                                                                                                                                                                                                                                                                                            |
|---------------------------------|------------------------------------------------------------------------------------------------------------------------------------------------------------------------------------------------------------------------------------------------------------------------------------------------------------------------------------------------------------------------------------------------------------------------------------------------------------------------------------------------------------------------------------------------------------------------------------------------------------------------------------------------------------------------------------------------------------------------------------------------------------------------------------------------------------------------------------------------------------------------------------------------------------------------------------------------------------------------------------------------------------|
| Journal:                        | <i>BMJ Open</i>                                                                                                                                                                                                                                                                                                                                                                                                                                                                                                                                                                                                                                                                                                                                                                                                                                                                                                                                                                                            |
| Manuscript ID                   | bmjopen-2017-018441                                                                                                                                                                                                                                                                                                                                                                                                                                                                                                                                                                                                                                                                                                                                                                                                                                                                                                                                                                                        |
| Article Type:                   | Protocol                                                                                                                                                                                                                                                                                                                                                                                                                                                                                                                                                                                                                                                                                                                                                                                                                                                                                                                                                                                                   |
| Date Submitted by the Author:   | 28-Jun-2017                                                                                                                                                                                                                                                                                                                                                                                                                                                                                                                                                                                                                                                                                                                                                                                                                                                                                                                                                                                                |
| Complete List of Authors:       | Rouleau, Geneviève; Université Laval, Faculty of Nursing Sciences; University of Montreal Hospital Research Centre (CRCHUM), Research Chair in Innovative Nursing Practices<br>Gagnon, Marie-Pierre; Université Laval, Faculty of Nursing Sciences; CHU de Québec Research Center, St.-François d'Assise Hospital<br>Côté, José; University of Montreal Hospital Research Centre (CRCHUM), Research Chair in Innovative Nursing Practices; Université de Montréal, Faculté des Sciences Infirmières<br>Payne-Gagnon, Julie; CHU de Québec Research Center, St.-François d'Assise Hospital<br>Hudson, Emilie; McGill University, Ingram School of Nursing; University of Montreal Hospital Research Centre (CRCHUM), Research Chair in Innovative Nursing Practices<br>Bouix-Picasso, Julien; Université de Montréal, Faculté des Sciences Infirmières; Université Paris 13-Sorbonne, Department of Health Sciences Pedagogy<br>Dubois, Carl-Ardy; Université de Montréal, Faculté des Sciences Infirmières |
| <b>Primary Subject Heading</b>: | Nursing                                                                                                                                                                                                                                                                                                                                                                                                                                                                                                                                                                                                                                                                                                                                                                                                                                                                                                                                                                                                    |
| Secondary Subject Heading:      | Medical education and training, Health informatics                                                                                                                                                                                                                                                                                                                                                                                                                                                                                                                                                                                                                                                                                                                                                                                                                                                                                                                                                         |
| Keywords:                       | e-learning, continuing education, nursing care, overview of systematic mixed studies reviews                                                                                                                                                                                                                                                                                                                                                                                                                                                                                                                                                                                                                                                                                                                                                                                                                                                                                                               |
|                                 |                                                                                                                                                                                                                                                                                                                                                                                                                                                                                                                                                                                                                                                                                                                                                                                                                                                                                                                                                                                                            |

SCHOLARONE™  
Manuscripts

## Effects of e-learning in a continuing education context on nursing care: an overview of systematic mixed studies reviews (protocol)

\*Geneviève Rouleau<sup>1,2</sup>

Marie-Pierre Gagnon<sup>1,3</sup>

José Côté<sup>2,4</sup>

Julie Payne-Gagnon<sup>3</sup>

Emilie Hudson<sup>2,5</sup>

Julien Bouix-Picasso<sup>4,6</sup>

Carl-Ardy Dubois<sup>4</sup>

1- Faculty of Nursing, Université Laval, Pavillon Ferdinand-Vandry, Quebec City (QC), Canada.

2- Research Center of the Centre Hospitalier de l'Université de Montréal, Montreal (QC), Canada.

3- CHU de Québec Research Center, St.-François d'Assise Hospital, Quebec City (QC), Canada.

4- Faculty of Nursing, Université de Montréal, Pavillon Marguerite-d'Youville. Montréal (QC), Canada.

5- Ingram School of Nursing, McGill University, Montreal (QC), Canada.

6- Department of Health Sciences Pedagogy, Université Paris 13-Sorbonne, Paris, France.

\*Corresponding author

Geneviève Rouleau, University of Montreal Hospital Research Centre, 850 rue St-Denis, Tour St-Antoine, 3<sup>rd</sup> floor, Door S03-424, Montreal (QC), Canada, H2X 0A9. Phone number: 1-514-890-8000 ext. 12744 [genevieve.rouleau.chum@ssss.gouv.qc.ca](mailto:genevieve.rouleau.chum@ssss.gouv.qc.ca)

Words count: 4031

## Abstract

**Introduction:** Continuing education (CE) is imperative to the future of professional nursing. The use of e-learning by registered nurses (RN) for CE is spreading. An overview of systematic mixed studies reviews (SMSRs) will be conducted to develop a broad picture of the effects of e-learning in a CE context on nursing care.

**Methods and analysis:** Quantitative, mixed studies, and qualitative reviews published in English, French, or Spanish from 1 January 2006 will be included. The outcomes of interest will be extracted and analyzed inductively and deductively from the Nursing Care Performance Framework (NCPF); some themes include nursing resources, nurses' practice environment, processes, professional satisfaction as well as nursing sensitive outcomes. Two reviewers will independently screen first the title and abstract of the papers and then the full texts in order to assess their eligibility. Two teams of two reviewers will extract the selected reviews' characteristics and data. The results from various types of reviews will be integrated using a data-based convergent synthesis design. We will conduct a thematic synthesis and transform all quantitative and mixed data into qualitative data.

**Ethics and dissemination:** Ethics approval is not required for overviews of SMSRs. We will summarize evidence concerning the negative, neutral and positive effects of various forms of e-learning on different aspects of nursing care. If we find gaps in the literature, we will highlight them and suggest ideas for further research. We will also focus on positive effects and present, if possible, the components and characteristics of e-learning interventions that were found to be successful. We will present this protocol and results in international conference in Nursing and in Medical and Health Informatics domains. We will also submit the results of our work for peer-review publication in a journal indexed in the international bibliographic database of biomedical information. **(297 words)**

## Keywords

e-learning; nursing care; overview, systematic mixed studies review; continuing education, nurses

## Strengths and limitations of this study

- The realization of an overview of systematic mixed studies reviews (SMSRs) is justified by the use of multiple methodological approaches and a diversity of data in order to broaden the repertoire of effects of e-learning on nursing care.
- To the best of our knowledge, this is the first overview of SMSRs that uses the Nursing Care Performance Framework to draw a broad, multidimensional and system-based perspectives on the dimensions and indicators of nursing care that can be impacted by e-learning interventions.
- The quality of overviews of SMSRs is still in its infancy regarding the reporting, the assessment of methodological quality, and the risks of bias and quality of evidence.
- One of the limits of overviews of SMSRs is the lack of granularity of information provided by the review authors.

## INTRODUCTION

Continuing education (CE), a term often used interchangeably with continuing professional development (CPD), lifelong learning, and staff development [1], is an imperative for the future of professional nursing [2]. In many countries CE is mandated by professional or regulatory bodies, which encourages nurses to participate in these activities [3]. CE is an opportunity to acquire knowledge, to improve performance, to support growth and development as a nursing profession, to expand the nursing role, and to introduce, develop, and advance professional competencies/skills [3,4]. Ultimately, CE is intended to improve quality of care and patients' health status due to changes in healthcare provider practice [5].

Nurses who are looking for CE activities face many barriers in terms of work schedule/commitments, lack of support (from co-workers, employers, organization), geographic distance, time away from work, and activity cost [6–8]. The use of electronic (i.e. computer and web-based) and mobile devices (i.e. smartphone, tablets) to support learning (i.e. e-learning and m-learning) is a promising avenue to face these challenges.

1  
2  
3 E-learning is an umbrella term that encompasses various concepts and technologies  
4 related to learning, such as distance, digital, electronic, online, Web-based and mobile  
5 learning [9]. For this work, we will use “e-learning” as the terminology entailing a variety of  
6 electronic, digital or mobile devices used to support learning. E-learning has many  
7 advantages: it reduces travel time, is flexible and accessible, can be cost-effective, and can  
8 allow learners to learn at their own pace and from the place of their choice [10,11].  
9  
10 Furthermore, e-learning has the potential to provide tailored content and instructional  
11 methods based on individual needs of the learners and can present a variety of multimedia  
12 components to support acquisition of knowledge and skills such as text, audio, still and  
13 motion visuals [10]. Even if there is no strong evidence to prove that e-learning is superior to  
14 traditional learning, results of systematic reviews support that this is an effective alternative  
15 way to learn [11–13]. Moreover, it has positive impacts on nurses’ knowledge, skills, level of  
16 self-efficacy and satisfaction [13,14].  
17

18  
19 However, e-learning is not a panacea [15]. Learners can encounter barriers, like skill  
20 requirement for using a particular device, low level of technological literacy, loss of time  
21 when the system/device doesn’t work properly, or the reduction of social contact compared to  
22 face-to-face learning [16,17]. Clark and Mayer [10] summarized drawbacks surrounding e-  
23 learning, such as too many multimedia components interacting at the same time, lack of  
24 features that promote learning, and the loss of an exploratory learning environments learners  
25 can lack of guidance. The authors highlighted an interesting point: learning is better  
26 supported by effective instructional methods than by delivery medium (i.e. virtual classroom,  
27 face-to-face classroom).  
28  
29  
30  
31  
32  
33  
34  
35  
36  
37  
38  
39  
40  
41  
42  
43  
44  
45  
46  
47  
48  
49  
50  
51  
52  
53  
54  
55  
56  
57  
58  
59  
60

1  
2  
3 E-learning technologies have been studied extensively in nursing, especially for  
4 students in an academic educational context, as supported in an overview of systematic  
5 reviews (n=22) [9,12]. The results of this overview didn't lead to robust evidence on the  
6 superiority of e-learning over traditional learning, nor did they conclude which technology or  
7 medium of e-learning was best to influence the acquisition of skills and knowledge for  
8 nursing students at undergraduate and postgraduate levels. However, e-learning was shown to  
9 reduce the cost related to education and save time for students and lecturers. To the best of  
10 our knowledge, there is no overview of reviews that focuses on e-learning in a CE context –  
11 such as a healthcare and/or professional setting – for registered nurses (RN).  
12  
13  
14  
15  
16  
17  
18  
19  
20  
21  
22  
23  
24  
25  
26

## 27 **Objective**

28  
29 The objective of this overview of systematic mixed studies review (SMSRs) is to  
30 systematically summarize the best evidence that comes from qualitative, quantitative and  
31 mixed studies reviews regarding the effects of e-learning in a nursing CE context on nursing  
32 care (i.e resources, services and patients' outcomes).  
33  
34  
35  
36  
37

38 To meet this objective, we will use a process of data conceptualization by mobilizing both  
39 inductive (data-driven) and deductive (theory-driven) approaches iteratively or  
40 simultaneously to guide all the methods and analysis processes. We will be open-minded to  
41 allow the emergence of new concepts, but we will also use concepts from existing  
42 framework, ie, the Nursing Care Performance Framework (NCPF)[18] as a tool to extract,  
43 synthesize and interpret data. The NCPF is useful to define an important concept of this  
44 overview, namely, “nursing care”.  
45  
46  
47  
48  
49  
50  
51  
52  
53  
54

## 55 **NURSING CARE PERFORMANCE FRAMEWORK**

56  
57  
58  
59  
60

1  
2  
3 The NCPF [18] will be used to conceptualize how e-learning interventions could  
4 influence nursing care and impact health outcomes. This is an organizational model,  
5 originally composed of three subsystems, 14 dimensions and 51 indicators, from which we  
6 have integrating elements of the actual scope of nursing practice [19] as well as findings from  
7 our previous work [20] (figure 1) carrying out the impact of information and communication  
8 technologies on nursing care. Figure 1 presents the range of possible outcomes for which data  
9 will be sought.  
10  
11  
12  
13  
14  
15  
16  
17  
18

19  
20 *Insert Figure 1 here*  
21

22 The NCPF shows how the interplay of three nursing subsystems (structure, services,  
23 and patients' outcomes) can operate to achieve three key functions: (1) acquiring, deploying,  
24 and maintaining nursing resources (structure); (2) transforming nursing resources into  
25 nursing services (processes); and (3) producing changes in patients' conditions in response to  
26 the nursing services provided ("nursing-sensitive outcomes" or patients' outcomes).  
27  
28  
29  
30  
31  
32  
33

34 The first function refers to the human and material resources needed to provide  
35 effective nursing care, such as nursing staff supply, working conditions, staff maintenance,  
36 and economic sustainability. The first way e-learning could influence nursing care is by  
37 considering it as part of the structure (as a resource, in the first function of the model). We  
38 could pay attention to these elements when we extract data from systematic reviews:  
39 exploring whether the availability of e-learning in healthcare settings impacts the quality of  
40 life at work for nurses and if e-learning acts as facilitator/motivator to enhance nurses'  
41 working conditions, or serve a barrier that inhibits them. Another question could be: to what  
42 extent can e-learning create favourable conditions that attracts nurses and reinforces stability  
43 in the workforce?  
44  
45  
46  
47  
48  
49  
50  
51  
52  
53  
54  
55  
56  
57  
58  
59  
60



1  
2  
3 The second function encompasses nursing services, which are defined in various  
4 dimensions: nurses' practice environments (i.e. nurse autonomy; collaboration), nursing  
5 processes (i.e. assessment, care planning, and evaluation; problems and symptom  
6 management), nurses' professional satisfaction and patient experience. E-learning can be  
7 viewed as a resource that has the potential to influence all dimensions of nursing services at  
8 different levels. E-learning can be seen as way to support nursing work and create a  
9 professional practice environment for nurses, for example, by allowing collaborative practice.  
10 E-learning could impact what nurses do, i.e. nursing interventions (processes) or the ability of  
11 nurses in using their competencies to provide healthcare. Resulting from these two  
12 dimensions, e-learning could influence nurses' professional satisfaction, in terms of quality of  
13 care provided, satisfaction or dissatisfaction of nurses using e-learning, and/or patient  
14 experience.

15  
16  
17  
18  
19  
20  
21  
22  
23  
24  
25  
26  
27  
28  
29  
30  
31  
32 The desirable end result of the interactions between nursing resources (structure) and  
33 nursing services is to improve patients' conditions. The third function is then described as the  
34 positive changes that can be detected among patients (also called "nursing-sensitive  
35 outcomes"). As other models used in the learning [5,21] domain, we could speculate that if  
36 e-learning changes nursing resources and nursing services, patients' outcomes could be  
37 potentially affected. Examples of indicators in the NCPF are: patient comfort and quality of  
38 life, risk outcomes and safety, empowerment and functional status.

## 39 40 41 42 43 44 45 46 47 48 49 50 **METHODS**

51  
52  
53 This protocol of this overview has been registered on International prospective  
54 register of systematic reviews (PROSPERO), registration number: (CRD42016050714). We  
55 used the Preferred Reporting Items for Systematic Reviews and Meta-Analysis Protocol  
56  
57  
58  
59  
60

1  
2  
3 (PRISMA-P) checklist to guide the elaboration of this protocol (see online supplementary  
4  
5 appendix 1) [22].  
6  
7

8 *Insert PRISMA-P here*  
9

## 10 **Design**

11 We will conduct an overview of SMSRs. The inclusion of reviews using multiple  
12 methodological approaches is justified by the possibility of broadening the repertoires of  
13 effects of e-learning on nursing care. An overview of systematic reviews (SRs) is a good way  
14 to derive the best available knowledge in a single document to afford broad, cumulative  
15 statements that summarize the existing evidence on the effectiveness of interventions [23].  
16  
17  
18  
19  
20  
21  
22  
23

24 As underlined by Lunny et al. [24], methods to conduct, interpret and report  
25 overviews are in their infancy. To the best of our knowledge, no unified and integrated tool  
26 allows a comprehensive reporting of overview of quantitative SRs, even less for SMSRs. We  
27 will follow the general methods for Cochrane reviews [25] and other relevant works in this  
28 domain [23,24,26] to conduct and report the overview.  
29  
30  
31  
32  
33  
34  
35

## 36 **Eligibility criteria**

37 The scope in this overview is formulated using PICOS (participants, interventions,  
38 comparisons, outcomes, study design) [27,28].  
39  
40  
41  
42

## 43 **Type of reviews**

44 We will include all types of qualitative, quantitative and mixed studies reviews that  
45 evaluate the influence of e-learning used by nurses on nursing care in a CE context, that have  
46 been published in French, English, or Spanish from January 1, 2006.  
47  
48  
49  
50  
51

## 52 **Publication type**

53 To be included, the reviews have to be “systematic” [29] :

- 54 • clear and unambiguous
- 55  
56  
57  
58  
59  
60

- include a type of research and one or a combination of method(s)
- have specific research question(s), precise inclusion criteria, a comprehensive search strategy, a quality appraisal process, and a rigorous synthesis.

The SMSRs must be published in peer-reviewed journal. Reports that state systematic methodology are included. We will exclude grey literature (i.e. conference proceedings, trial registries, dissertations) and non SMSRs such as literature reviews.

### Population

We will include RNs according to the professional legislation of each country.

Reviews that target RNs and other health professionals (i.e. physicians) will be included, as long as it is possible to differentiate nurses and to extract these relevant participants' data.

Patients receiving care from qualified RNs through the medium of e-learning will be part of this work, as long as nursing-related outcomes are discussed. We will exclude undergraduate nursing students in an academic context.

### Intervention

All types of e-learning delivered through different devices are targeted. Blended learning interventions will be included as long as they have an "electronic" or "digital" component. Any types of simulation, including with a "physical" mannequin (i.e. high-fidelity simulation, technology-enhanced simulation) will be excluded.

### Comparisons

We will include these type of comparisons: face-to-face learning, any other e-learning intervention and blended learning.

## Outcomes

The outcomes will include but are not limited to the three subsystems (i.e. nursing resources, nursing services and nursing sensitive outcomes), dimensions (i.e. working conditions, time and efficiency, nurses' practice environment, nursing processes, professional satisfaction, nursing sensitive outcome) and indicators (i.e. learning, nurse-patient relationship, knowledge access) showed in the adapted version of the NCPF in Figure 1.

Definitions and/or examples of components are presented (see online supplementary appendix 2) related to each outcome of interest. The purpose is not to provide "standardized" definitions but to offer a guidance for the data extraction process. No "standardized" definition is available for the outcome of interest based on the fact that reviews included in this overview may have: diversity in terms of nature of data (quantitative, qualitative and mixed), heterogeneity in e-learning interventions, and various possible outcomes.

Furthermore, the data synthesis approach is abductive. This means that we will use the NCPF as a starting point to extract the data and analyze them, but we will let new data emerge from the reviews. If stable and fixed definitions are provided, the inductive part can be compromised.

The main outcomes of interests are those targeting the effects of e-learning on nursing resources and services. Then, if the outcomes belonging to these dimensions are found in the reviews, patients' outcomes will be extracted.

We will exclude reviews that focus only on patients' outcomes without discussing nursing resources or services. Determinants of e-learning use ( i.e. intended use) without reporting "actual use" of e-learning will also be excluded.

## Search methods for the identification of reviews

Publications will be searched through general health sciences (PubMed), nursing (CINAHL), education electronic databases (Education Source and ERIC) as well as those containing systematic reviews publications (Cochrane Database of Systematic Reviews). Structured search strategies will be developed using the thesaurus terms of each database and using free text, targeting the “title” and “abstract” fields. The strategies will be adapted to the other databases. The search strategy will be developed by the research team and validated by a health information specialist. The results of each database search will be collected in a single reference database, and duplicate citations will be removed. An example of the search strategy in PubMed is presented (see online supplementary appendix 3). This strategy will be adapted and refined according to the specificities of the databases. Furthermore, to obtain additional reviews, we will contact authors to find other relevant works in this domain and will consult reference lists of included reviews.

## DATA COLLECTION AND ANALYSIS

### Selection of reviews

The research team will use Distiller SR software from Evidence Partners (Ottawa, Canada) to perform the overall overview. Citations retrieved from the searches will be imported into a reference management software such as Endnote. The database containing all the references will then be imported in Distiller SR. Three reviewers (GR, JPG, EH) will independently screen the title and abstract of the papers in order to assess their eligibility. Each paper will be reviewed twice. The reviewers will compare their results, and discuss them in case of discrepancies. If a consensus cannot be reached, arbitration with a third review author will be required. After the first round of screening, full text copies of publications that meet the pre-established inclusion criteria will be retrieved. In cases when

1  
2  
3 the information regarding the eligibility of a review is limited or incomplete ( i.e.when only  
4 an abstract is available), we will contact authors to request the full text or further details. We  
5  
6 will use the Preferred Reporting Items for Systematic Reviews and Meta-Analyses  
7  
8 (PRISMA) flow diagram to show the overall process of reviews selection [30].  
9  
10  
11

### 12 13 **Data extraction and management**

14  
15 The coding process will be done by four independent reviewers (GR, JPG, EH, JBP).  
16  
17 We will use the NCPF to code, organize and classify the data according to the three  
18  
19 subsystems (i.e. resources/structure, services, outcomes), the dimensions and the indicators.  
20  
21 This is the deductive part of the synthesis. Additional codes will be generated inductively by  
22  
23 the four reviewers from the text of the articles without fitting them into the existing model.  
24  
25 The four reviewers will begin by coding a set of the same three articles independently in  
26  
27 order to ensure consistency during the coding and data extraction process. The independently  
28  
29 developed frameworks or “coding plan” will then be compared and combined into a single  
30  
31 integrated framework [24]. Any conflict arising through this extraction process will be  
32  
33 discussed between the four reviewers. After a general agreement on coding and data  
34  
35 extraction, the remaining articles will be divided equally between two teams of two  
36  
37 reviewers.  
38  
39  
40  
41  
42

43  
44 The four reviewers will summarize general characteristics about reviews: purpose,  
45  
46 type of review (qualitative, quantitative, mixed), examples of topics covered, number of  
47  
48 studies included, target populations, search dates and context (i.e. mandatory CE, workplace).  
49  
50 Details about e-learning interventions, comparisons and outcomes will also be extracted as  
51  
52 follow: examples of e-learning intervention, devices or media used, examples of educational  
53  
54 strategies and material, theory used to develop and evaluate interventions (i.e. learning  
55  
56 theory, behavioural change), examples of comparison interventions, dimensions and  
57  
58  
59  
60

1  
2  
3 indicators based on adapted version of NCPF, effects of e-learning as reported by authors,  
4  
5 and nature of the effects (quantitative, qualitative or mixed). Any disagreements arising  
6  
7 during the data extraction process will be resolved by discussion and consensus involving the  
8  
9 two reviewers, or will involve a third review author if needed.  
10  
11

### 12 **Methodological quality assessment of included reviews**

13  
14 In this overview we will include different types of SRs. The array of underlying types  
15  
16 of SRs combining qualitative and quantitative evidence can render reporting and the  
17  
18 assessing the quality of overviews more complex. At the time of this overview, we found no  
19  
20 reporting guidelines on assessing methodological quality of mixed studies and qualitative  
21  
22 reviews.  
23  
24  
25

26  
27 One of the most commonly used tools for authors of SRs and overviews of quantitative  
28  
29 SRs using a randomized controlled trial (RCT) design is the Assessment of Multiple  
30  
31 Systematic Reviews (AMSTAR) [31,32]. AMSTAR is an 11-item checklist from which  
32  
33 reviewers assign one point when the criterion is met. Quality is characterized at three levels:  
34  
35 8 to 11 is high quality (i.e. minor or no methodological limitations), 4 to 7 is medium quality  
36  
37 (i.e. moderate methodological limitations), and 0 to 3 is low quality (i.e. major  
38  
39 methodological limitations) [33]. AMSTAR items provide an assessment of methodological  
40  
41 criteria such as the comprehensiveness of the search strategy and whether the quality of  
42  
43 included studies was evaluated and accounted for [34]. Although AMSTAR has limitations  
44  
45 (i.e. inappropriateness of applying some criteria to mixed-method and qualitative reviews), as  
46  
47 underlined in previous work [20], the four reviewers (GR, JPG, EH, JBP) will apply the tool  
48  
49 to all reviews in order to use the same criteria for quality assessment.  
50  
51  
52  
53  
54  
55  
56  
57  
58  
59  
60

## Risks of bias and quality of evidence

Others challenges encountered for authors of overviews are the assessment of limitations (risk of bias) as well as the quality of evidence in systematic reviews [24,31]. We found no tool or guidance to perform these tasks for authors of overviews of SMSRs. The Grades of Recommendation, Assessment, Development and Evaluation (GRADE) has been largely adopted as a tool to judge the overall quality of evidence for each individual outcome (i.e. consideration of within-study risk of bias, directness of evidence, heterogeneity, precision of effect estimates and risk of publication bias) in the context of quantitative primary studies, especially those using experimental or quasi-experimental designs [35,36]. When the unit of analysis is SRs (and not primary studies), it is not always possible to extract GRADE ratings because data can be missing, not reported adequately or reported in different ways across the SRs. The use of a tool to assess the quality of evidence has to be modified for use in overviews [37]. Recently, two tools have been published to assess both the confidence in qualitative review findings (methodological quality or dependability) and the potential influence of study quality on the review findings: Confidence of synthesized qualitative findings, named ConQual [38], and Confidence in the Evidence from Reviews of Qualitative research, called CERQual [39]. They both aim to provide a qualitative equivalent to the GRADE approach and they both present a final ranking [40], but they are not currently considered as gold standard. We found no tool to assess the quality of evidence in mixed studies reviews. In this overview, we will report the assessment of quality of evidence and risk of bias performed by original SMSRs authors who used GRADE, ConQUAL, CerQUAL or other approaches.

Finally, another element to consider in an overview is the risk of biased results caused by the repetition of primary studies that are included more than once (i.e. overlaps) across the



1  
2  
3 reviews [41]. It is important to calculate the actual degree of overlap in overviews with the  
4  
5 corrected covered area (CCA) method in order to report these overlaps properly [41]. As  
6  
7 suggested by Studzinski *et al* [42], one reviewer will generate a matrix that will cross-link  
8  
9 SMSRs (columns) with primary studies included in SMSRs (rows), and a second reviewer  
10  
11 will check the matrix.  
12  
13

## 14 15 **Data synthesis**

16  
17 An important challenge of data synthesis is the integration of the quantitative,  
18  
19 qualitative and mixed studies reviews [43]. In order to integrate the results from various types  
20  
21 of reviews, we will perform a qualitative thematic synthesis using a data-based based  
22  
23 convergent synthesis design [44,45], which is an approach used by authors conducting MSRs.  
24  
25 We will qualify quantitative data, as we did in our previous work [20]. Qualifying the  
26  
27 quantitative data means that we will use a textual and narrative approach to name and qualify  
28  
29 the effect. For instance, if the results of the review show that e-learning leads to significant  
30  
31 increase of knowledge, instead of reporting the *p* value, we will qualify the result: positive  
32  
33 effect of e-learning on knowledge level. Frantzen & Fetters [43] call this approach  
34  
35 “transformation”, in which quantitative data are transformed into qualitative ones. We will  
36  
37 also organize the results into themes and sub-themes according the specific dimensions of  
38  
39 nursing care (i.e. practice environment, nursing processes, professional satisfaction, and  
40  
41 nursing-sensitive outcomes) and their corresponding indicators. Even if this is an uncommon  
42  
43 approach (using a convergent synthesis by qualifying quantitative data), we do believe that  
44  
45 this way of synthesizing will allow us keeping the richness of the results.  
46  
47  
48  
49  
50  
51  
52

53 In order to transform all quantitative and mixed data into qualitative, we will use  
54  
55 Thomas and Harden’s [46] approach. We will follow these three steps: (1) coding relevant  
56  
57 extracts of each SR line by line; (2) developing descriptive themes; and (3) generating  
58  
59  
60

1  
2  
3 analytical themes. This might lead to an adapted version of the NCPF cited earlier. The  
4  
5 thematic synthesis will be done in an inductive and deductive way (i.e. abductive), which  
6  
7 means that some themes will be organized based on the NCPF [20,21,47] while others will  
8  
9 emerge inductively.  
10  
11

## 12 13 14 **CONCLUSION**

15  
16 Results of this overview could be used to understand the dimensions of nursing care  
17  
18 that have the potential to be supported, enhanced or constrained by the use of e-learning to  
19  
20 sustain CE activities among nurses. This overview is in continuity with previous work that  
21  
22 has been done about the impacts of various types of ICTs (excluding e-learning interventions)  
23  
24 on nursing care [20]. Some reviews on e-learning used by nurses or nursing students target  
25  
26 specific outcomes, especially knowledge, attitudes, barriers and facilitators, skills and  
27  
28 satisfaction regarding the use of e-learning [13,14,48,49]. By using the NCPF to organize,  
29  
30 extract and analyze the data, this overview could provide a good starting point to deepen our  
31  
32 understanding regarding the dimensions and indicators of nursing care that can be impacted  
33  
34 by e-learning. With the growing presence of digital devices in nursing care systems, we think  
35  
36 it is important to document the interaction of e-learning and nursing care dimensions and  
37  
38 indicators. We believe that if we better understand the effects of these e-learning  
39  
40 interventions, we could deploy strategies to facilitate their implementation and their  
41  
42 integration in nursing care, nursing research, management and education. Consequently, we  
43  
44 could overcome negative effects and optimize positive ones in order to use them to their full  
45  
46 potential as a tool to support nursing practice and, ultimately, improve patient outcomes.  
47  
48  
49  
50  
51  
52

## 53 54 **Authors' contributions**

55  
56 GR is the guarantor, supervised by MPG and JC. GR drafted the manuscript with input from  
57  
58 MPG and JC. GR, MPG, JC, JPG and EH contributed to the development of the selection  
59  
60

1  
2  
3 criteria, the quality assessment strategy and data extraction criteria. GR and MPG  
4 participated in the development of the search strategy. CAD provided expertise on the  
5 application of the NCPF as the first author of the framework. JBP contributed to integrate  
6 relevant references in e-learning and in methodological quality assessment. GR and JPG were  
7 involved in the screening of titles and abstracts. GR, JPG and EH are responsible for  
8 screening full texts. GR, JPG, EH and JBP will be responsible of data extraction. All authors  
9 read, provided feedback and approved the final manuscript.  
10  
11

## 12 13 **Funding**

14  
15 This work was supported by Quebec Network on Nursing Intervention Research from a  
16 funding *Fonds de recherche du Québec Santé (FRQS)- Ministère de la santé et des services*  
17 *sociaux* (MSSS) (grant # 26674).  
18  
19

## 20 21 **Acknowledgements**

22 GR is funded by Canadian Institutes of Health Research (CIHR), FRQS and Quebec SPOR-  
23 SUPPORT Unit for her doctoral studies. MPG holds the Tier 2 Canadian Research Chair on  
24 Technologies and Practices in Health and JC holds the Research Chair on Innovative Nursing  
25 Practices. Special thanks to Tripti Pande who has performed the search strategy, and Frédéric  
26 Bergeron, health information specialist at Université Laval, who gave precious advices in developing  
27 search strategy.  
28  
29

## 30 31 **Competing interests statement**

32 The authors declare that they have no competing interests.  
33  
34

## 35 36 **Provenance and peer review**

37 Not commissioned; externally peer reviewed.  
38  
39

## 40 41 **Data sharing statement**

42 The authors will submit the results of the study for peer-review publication in a journal  
43 indexed in the international bibliographic database of biomedical information.  
44  
45

## 46 47 **Open Access**

48 This is an Open Access article distributed in accordance with the Creative Commons  
49 Attribution Non Commercial (CC BY-NC 4.0) license, which permits others to distribute,  
50 remix, adapt, build upon this work non commercially, and license their derivative works on  
51 different terms, provided the original work is properly cited and the use is non-commercial.  
52 See: <http://creativecommons.org/licenses/by-nc/4.0/>  
53  
54  
55  
56  
57  
58  
59  
60

## References

- 1 Hegney D, Tuckett A, Parker D, *et al*. Access to and support for continuing professional education amongst Queensland nurses: 2004 and 2007. *Nurse Educ Today* 2010;**30**:142–9. doi:10.1016/j.nedt.2009.06.015
- 2 Institute of Medicine. Future of Nursing : Leading Change, Advancing Health. Washington, DC: The National Academies press 2011. <https://www.nap.edu/catalog/12956/the-future-of-nursing-leading-change-advancing-health> (accessed 25 Jun 2017).
- 3 Ross K, Barr J, Stevens J. Mandatory continuing professional development requirements: what does this mean for Australian nurses. *BMC Nurs* 2013;**12**:9. doi:10.1186/1472-6955-12-9
- 4 Gallagher L. Continuing education in nursing: A concept analysis. *Nurse Educ Today* 2007;**27**:466–73. doi:10.1016/j.nedt.2006.08.007
- 5 Moore DE, Green JS, Gallis HA. Achieving desired results and improved outcomes: integrating planning and assessment throughout learning activities. *J Contin Educ Health Prof* 2009;**29**:1–15. doi:10.1002/chp.20001
- 6 Billings D. Distance Education in Nursing: 25 years and going strong. *Comput Inform Nurs* 2007;**25**:121–3. doi:10.1097/01.NCN.0000270044.67905.4a
- 7 Horiuchi S, Yaju Y, Koyo M, *et al*. Evaluation of a web-based graduate continuing nursing education program in Japan: A randomized controlled trial. *Nurse Educ Today* 2009;**29**:140–9. doi:10.1016/j.nedt.2008.08.009
- 8 Shahhosseini Z, Hamzehgardeshi Z. The Facilitators and Barriers to Nurses' Participation in Continuing Education Programs: A Mixed Method Explanatory Sequential Study. *Glob J Health Sci* 2015;**7**:184. doi:10.5539/gjhs.v7n3p184
- 9 De Caro W, Marucci AR, Lancia L, *et al*. Case Study 2: E-Learning in Nursing Education in Academic Fields. In: *Umbrella Reviews: Evidence Synthesis with Overviews of Reviews and Meta-Epidemiologic Studies*. Switzerland: Biondi-Zoccai. G. 2016. 290–303.
- 10 Clark R, Mayer R. *e-Learning and the Science of Instruction: Proven Guidelines for Consumers and Designers of Multimedia Learning*. 4th ed. Hoboken, New Jersey: Wiley 2016.
- 11 Cook DA, Levinson AJ, Garside S, *et al*. Internet-Based Learning in the Health Professions: A Meta-analysis. *JAMA* 2008;**300**:1181–96. doi:10.1001/jama.300.10.1181
- 12 De Caro W, Marucci AR, Giordani M, *et al*. [E-learning and university nursing education: an overview of reviews]. *Prof Inferm* 2014;**67**:107. doi:10.7429/pi.2013.672107
- 13 Lahti M, Hätönen H, Välimäki M. Impact of e-learning on nurses' and student nurses knowledge, skills, and satisfaction: A systematic review and meta-analysis. *Int J Nurs Stud* 2014;**51**:136–49. doi:10.1016/j.ijnurstu.2012.12.017
- 14 Du S, Liu Z, Liu S, *et al*. Web-based distance learning for nurse education: a systematic review. *Int Nurs Rev* 2013;**60**:167–77. doi:10.1111/inr.12015

- 1  
2  
3 15 Cook DA, Garside S, Levinson AJ, *et al*. What do we mean by web-based learning? A systematic  
4 review of the variability of interventions. *Med Educ* 2010;**44**:765–74. doi:10.1111/j.1365-  
5 2923.2010.03723.x  
6  
7  
8 16 Button D, Harrington A, Belan I. E-learning & information communication technology (ICT) in  
9 nursing education: A review of the literature. *Nurse Educ Today* 2014;**34**:1311–23.  
10 doi:10.1016/j.nedt.2013.05.002  
11  
12 17 McVeigh H. Factors influencing the utilisation of e-learning in post-registration nursing students.  
13 *Nurse Educ Today* 2009;**29**:91–9. doi:10.1016/j.nedt.2008.07.004  
14  
15 18 Dubois C-A, D'Amour D, Pomey M-P, *et al*. Conceptualizing performance of nursing care as a  
16 prerequisite for better measurement: a systematic and interpretive review. *BMC Nurs* 2013;**12**:7.  
17 doi:10.1186/1472-6955-12-7  
18  
19 19 D'Amour D, Dubois C-A, Déry J, *et al*. Measuring Actual Scope of Nursing Practice: A New  
20 Tool for Nurse Leaders. *J Nurs Adm* 2012;**42**:248–55. doi:10.1097/NNA.0b013e31824337f4  
21  
22 20 Rouleau G, Gagnon M-P, Côté J, *et al*. Impact of Information and Communication Technologies  
23 on Nursing Care: Results of an Overview of Systematic Reviews. *J Med Internet Res*  
24 2017;**19**:e122. doi:10.2196/jmir.6686  
25  
26 21 Kirkpatrick DL. *Evaluating training programs : the four levels*. 1st ed. San Francisco: Berrett-  
27 Koehler 1994.  
28  
29 22 Shamseer L, Moher D, Clarke M, *et al*. Preferred reporting items for systematic review and meta-  
30 analysis protocols (PRISMA-P) 2015: elaboration and explanation. *BMJ* 2015;**349**:g7647.  
31 doi:10.1136/bmj.g7647  
32  
33 23 Smith V, Devane D, Begley C, *et al*. Methodology in conducting a systematic review of  
34 systematic reviews of healthcare interventions. *BMC Med Res Methodol* 2011;**11**:15.  
35 doi:10.1186/1471-2288-11-15  
36  
37 24 Lunny C, Brennan SE, McDonald S, *et al*. Evidence map of studies evaluating methods for  
38 conducting, interpreting and reporting overviews of systematic reviews of interventions: rationale  
39 and design. *Syst Rev* 2016;**5**. doi:10.1186/s13643-015-0178-0  
40  
41 25 Higgins J, Green S. *Cochrane Handbook for Systematic Reviews of Interventions. Version 5.1.0*  
42 *[updated March 2011]*. 2011. <http://handbook.cochrane.org> (accessed 13 Mar 2017).  
43  
44 26 Becker L, Oxman A. Chapter 22: Overviews of reviews. In: Higgins JPT, Green S, eds. *Cochrane*  
45 *Handbook for Systematic Reviews of Interventions [updated March 2011]*.  
46 [http://handbook.cochrane.org/chapter\\_22/22\\_overviews\\_of\\_reviews.htm](http://handbook.cochrane.org/chapter_22/22_overviews_of_reviews.htm) (accessed 13 Mar 2017).  
47  
48 27 O'Connor D, Green S, Higgins JPT. Chapter 5: Defining the review question and developing  
49 criteria for including studies. In: Higgins JPT, Green S, eds. *Cochrane Handbook for Systematic*  
50 *Reviews of Interventions [updated March 2011]*. The Cochrane Collaboration 2011.  
51 [http://handbook.cochrane.org/chapter\\_5/5\\_defining\\_the\\_review\\_question\\_and\\_developing\\_criteri](http://handbook.cochrane.org/chapter_5/5_defining_the_review_question_and_developing_criteri)  
52 [a\\_for.htm](http://handbook.cochrane.org/chapter_5/5_defining_the_review_question_and_developing_criteri) (accessed 13 Mar 2017).  
53  
54  
55  
56  
57  
58  
59  
60

- 1  
2  
3 28 Centre for Reviews and Dissemination. Systematic reviews: CRD's guidance for undertaking  
4 reviews in health care. 2009. <https://www.york.ac.uk/crd/guidance/> (accessed 8 May 2017).  
5  
6  
7 29 Pluye P, Hong QN, Bush PL, *et al.* Opening-up the definition of systematic literature review: the  
8 plurality of worldviews, methodologies and methods for reviews and syntheses. *J Clin Epidemiol*  
9 2016;**73**:2–5. doi:10.1016/j.jclinepi.2015.08.033  
10  
11 30 Liberati A. The PRISMA Statement for reporting systematic reviews and meta-analyses of  
12 studies that evaluate health care interventions: explanation and elaboration. *PLOS Med*  
13 2009;**6**:e1000100. doi:10.1371/journal.pmed.1000100  
14  
15 31 Shea B, Grimshaw J, Wells G, *et al.* Development of AMSTAR: a measurement tool to assess the  
16 methodological quality of systematic reviews. *BMC Med Res Methodol* 2007;**7**:10.  
17 doi:10.1186/1471-2288-7-10  
18  
19 32 Shea BJ, Hamel C, Wells GA, *et al.* AMSTAR is a reliable and valid measurement tool to assess  
20 the methodological quality of systematic reviews. *J Clin Epidemiol* 2009;**62**:1013–20.  
21 doi:10.1016/j.jclinepi.2008.10.009  
22  
23 33 Sharif MO, Janjua-Sharif FN, Sharif FNJ, *et al.* Systematic reviews explained: AMSTAR-how to  
24 tell the good from the bad and the ugly. *Oral Health Dent Manag* 2013;**12**:9. doi:PMID:  
25 23474576  
26  
27  
28 34 Weir M, Ryan R, Mayhew A, *et al.* The Rx for Change database: a first-in-class tool for optimal  
29 prescribing and medicines use. *Implement Sci* 2010;**5**:89. doi:doi: 10.1186/1748-5908-5-89  
30  
31 35 Schünemann HJ, Oxman AD, Gunn E V, *et al.* Interpreting results and drawing conclusions. In:  
32 *Cochrane Handbook for Systematic Reviews of Interventions. Version 5.1.0 [updated March*  
33 *2011]*. Higgins, J., Green, S. 2014. <http://handbook.cochrane.org> (accessed 13 Mar 2017).  
34  
35 36 Guyatt GH, Oxman AD, Vist GE, *et al.* GRADE: an emerging consensus on rating quality of  
36 evidence and strength of recommendations. *BMJ* 2008;**336**:924–6.  
37 doi:10.1136/bmj.39489.470347.AD  
38  
39 37 Pollock M, Fernandes RM, Becker LA, *et al.* What guidance is available for researchers  
40 conducting overviews of reviews of healthcare interventions? A scoping review and qualitative  
41 metasummary. *Syst Rev* 2016;**5**:190. doi:10.1186/s13643-016-0367-5  
42  
43 38 Munn Z, Porritt K, Lockwood C, *et al.* Establishing confidence in the output of qualitative  
44 research synthesis: the ConQual approach. *BMC Med Res Methodol* 2014;**14**. doi:10.1186/1471-  
45 2288-14-108  
46  
47  
48 39 Lewin S, Glenton C, Munthe-Kaas H, *et al.* Using Qualitative Evidence in Decision Making for  
49 Health and Social Interventions: An Approach to Assess Confidence in Findings from Qualitative  
50 Evidence Syntheses (GRADE-CERQual). *PLOS Med* 2015;**12**:e1001895.  
51 doi:10.1371/journal.pmed.1001895  
52  
53 40 Carroll C, Booth A. Quality assessment of qualitative evidence for systematic review and  
54 synthesis: Is it meaningful, and if so, how should it be performed? *Res Synth Methods*  
55 2015;**6**:149–54. doi:10.1002/jrsm.1128  
56  
57  
58  
59  
60

- 1  
2  
3 41 Pieper D, Antoine S-L, Mathes T, *et al.* Systematic review finds overlapping reviews were not  
4 mentioned in every other overview. *J Clin Epidemiol* 2014;**67**:368–75.  
5 doi:10.1016/j.jclinepi.2013.11.007  
6
- 7 42 Studziński K, Tomasiak T, Krzysztoń J, *et al.* Effect of using cardiovascular risk scoring in routine  
8 risk assessment in primary prevention of cardiovascular disease: protocol for an overview of  
9 systematic reviews. *BMJ Open* 2017;**7**:e014206. doi:10.1136/bmjopen-2016-014206  
10
- 11 43 Frantzen KK, Feters MD. Meta-integration for synthesizing data in a systematic mixed studies  
12 review: insights from research on autism spectrum disorder. *Qual Quant* 2016;**50**:2251–77.  
13 doi:10.1007/s11135-015-0261-6  
14
- 15 44 Pluye P, Hong QN. Combining the Power of Stories and the Power of Numbers: Mixed Methods  
16 Research and Mixed Studies Reviews. Published Online First: 18 March 2014.  
17 doi:10.1146/annurev-publhealth-032013-182440  
18
- 19 45 Creswell JW. *Research design : qualitative, quantitative, and mixed methods approaches*. 4th ed.  
20 Thousand Oaks: SAGE Publications 2014.  
21
- 22 46 Thomas J, Harden A. Methods for the thematic synthesis of qualitative research in systematic  
23 reviews. *BMC Med Res Methodol* 2008;**8**:45. doi:10.1186/1471-2288-8-45  
24
- 25 47 Dubois C-A, D'Amour D, Brault I, *et al.* Indicateurs prioritaires pour évaluer la contribution  
26 infirmière à la qualité des soins : revue systématique des écrits. Montréal, CA: 2015.  
27
- 28 48 George PP, Papachristou N, Belisario JM, *et al.* Online eLearning for undergraduates in health  
29 professions: A systematic review of the impact on knowledge, skills, attitudes and satisfaction. *J*  
30 *Glob Health* 2014;**4**. doi:10.7189/jogh.04.010406  
31
- 32 49 Phillips JL, Piza M, Ingham J. Continuing professional development programmes for rural nurses  
33 involved in palliative care delivery: An integrative review. *Nurse Educ Today* 2012;**32**:385–92.  
34 doi:10.1016/j.nedt.2011.05.005  
35  
36  
37  
38  
39  
40  
41  
42  
43  
44  
45  
46  
47  
48  
49  
50  
51  
52  
53  
54  
55  
56  
57  
58  
59  
60

1  
2  
3  
4  
5  
6  
7  
8  
9  
10  
11  
12  
13  
14  
15  
16  
17  
18  
19  
20  
21  
22  
23  
24  
25  
26  
27  
28  
29  
30  
31  
32  
33  
34  
35  
36  
37  
38  
39  
40  
41  
42  
43  
44  
45  
46  
47  
48  
49  
50  
51  
52  
53  
54  
55  
56  
57  
58  
59  
60

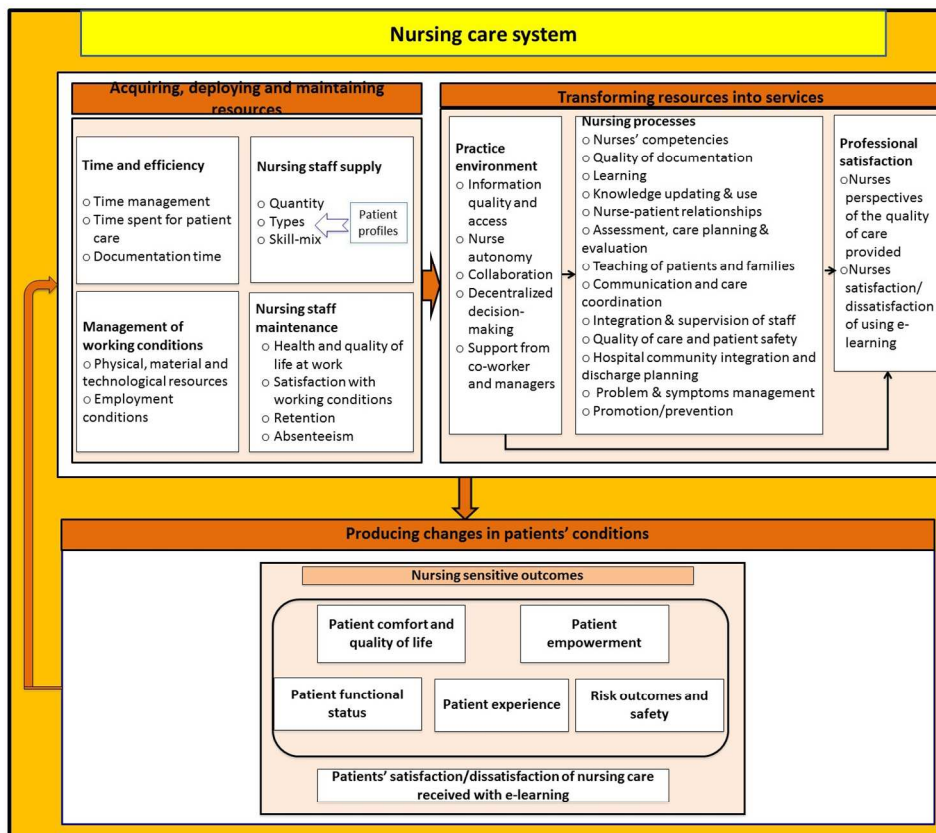

Figure 1. Nursing Care Performance Framework adapted from previous works

420x450mm (96 x 96 DPI)

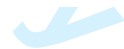



1  
2  
3  
4  
5  
6  
7  
8  
9  
10  
11  
12  
13  
14  
15  
16  
17  
18  
19  
20  
21  
22  
23  
24  
25  
26  
27  
28  
29  
30  
31  
32  
33  
34  
35  
36  
37  
38  
39  
40  
41  
42  
43  
44  
45  
46  
47  
48  
49

**Appendix 1: PRISMA-P (Preferred Reporting Items for Systematic review and Meta-Analysis Protocols) 2015 checklist: recommended items to address in a systematic review protocol**

**Title: Effects of e-learning interventions in continuing education context on nursing care: an overview of systematic mixed studies reviews (protocol)**

| Section and topic                 | Item No | Checklist item                                                                                                                                                                                                                | Reported on page # |
|-----------------------------------|---------|-------------------------------------------------------------------------------------------------------------------------------------------------------------------------------------------------------------------------------|--------------------|
| <b>ADMINISTRATIVE INFORMATION</b> |         |                                                                                                                                                                                                                               |                    |
| Title:                            |         |                                                                                                                                                                                                                               |                    |
| Identification                    | 1a      | Identify the report as a protocol of a systematic review                                                                                                                                                                      | 1                  |
| Update                            | 1b      | If the protocol is for an update of a previous systematic review, identify as such                                                                                                                                            | n/a                |
| Registration                      | 2       | If registered, provide the name of the registry (such as PROSPERO) and registration number                                                                                                                                    | 8                  |
| Authors:                          |         |                                                                                                                                                                                                                               |                    |
| Contact                           | 3a      | Provide name, institutional affiliation, e-mail address of all protocol authors; provide physical mailing address of corresponding author                                                                                     | 1                  |
| Contributions                     | 3b      | Describe contributions of protocol authors and identify the guarantor of the review                                                                                                                                           | 17                 |
| Amendments                        | 4       | If the protocol represents an amendment of a previously completed or published protocol, identify as such and list changes; otherwise, state plan for documenting important protocol amendments                               | n/a                |
| Support:                          |         |                                                                                                                                                                                                                               |                    |
| Sources                           | 5a      | Indicate sources of financial or other support for the review                                                                                                                                                                 | 17                 |
| Sponsor                           | 5b      | Provide name for the review funder and/or sponsor                                                                                                                                                                             | n/a                |
| Role of sponsor or funder         | 5c      | Describe roles of funder(s), sponsor(s), and/or institution(s), if any, in developing the protocol                                                                                                                            | n/a                |
| <b>INTRODUCTION</b>               |         |                                                                                                                                                                                                                               |                    |
| Rationale                         | 6       | Describe the rationale for the review in the context of what is already known                                                                                                                                                 | 5                  |
| Objectives                        | 7       | Provide an explicit statement of the question(s) the review will address with reference to participants, interventions, comparators, and outcomes (PICO)                                                                      | 5                  |
| <b>METHODS</b>                    |         |                                                                                                                                                                                                                               |                    |
| Eligibility criteria              | 8       | Specify the study characteristics (such as PICO, study design, setting, time frame) and report characteristics (such as years considered, language, publication status) to be used as criteria for eligibility for the review | 8-10               |
| Information sources               | 9       | Describe all intended information sources (such as electronic databases, contact with study authors, trial registers or other grey                                                                                            | 11                 |

|                                    |     |                                                                                                                                                                                                                                                  |            |
|------------------------------------|-----|--------------------------------------------------------------------------------------------------------------------------------------------------------------------------------------------------------------------------------------------------|------------|
|                                    |     | literature sources) with planned dates of coverage                                                                                                                                                                                               |            |
| Search strategy                    | 10  | Present draft of search strategy to be used for at least one electronic database, including planned limits, such that it could be repeated                                                                                                       | Appendix 3 |
| Study records:                     |     |                                                                                                                                                                                                                                                  |            |
| Data management                    | 11a | Describe the mechanism(s) that will be used to manage records and data throughout the review                                                                                                                                                     | 11         |
| Selection process                  | 11b | State the process that will be used for selecting studies (such as two independent reviewers) through each phase of the review (that is, screening, eligibility and inclusion in meta-analysis)                                                  | 11         |
| Data collection process            | 11c | Describe planned method of extracting data from reports (such as piloting forms, done independently, in duplicate), any processes for obtaining and confirming data from investigators                                                           | 12-13      |
| Data items                         | 12  | List and define all variables for which data will be sought (such as PICO items, funding sources), any pre-planned data assumptions and simplifications                                                                                          | 8-10       |
| Outcomes and prioritization        | 13  | List and define all outcomes for which data will be sought, including prioritization of main and additional outcomes, with rationale                                                                                                             | Appendix 2 |
| Risk of bias in individual studies | 14  | Describe anticipated methods for assessing risk of bias of individual studies, including whether this will be done at the outcome or study level, or both; state how this information will be used in data synthesis                             | 13-15      |
| Data synthesis                     | 15a | Describe criteria under which study data will be quantitatively synthesised                                                                                                                                                                      | -          |
|                                    | 15b | If data are appropriate for quantitative synthesis, describe planned summary measures, methods of handling data and methods of combining data from studies, including any planned exploration of consistency (such as $I^2$ , Kendall's $\tau$ ) | -          |
|                                    | 15c | Describe any proposed additional analyses (such as sensitivity or subgroup analyses, meta-regression)                                                                                                                                            | -          |
|                                    | 15d | If quantitative synthesis is not appropriate, describe the type of summary planned                                                                                                                                                               | 15-16      |
| Meta-bias(es)                      | 16  | Specify any planned assessment of meta-bias(es) (such as publication bias across studies, selective reporting within studies)                                                                                                                    | n/a        |
| Confidence in cumulative evidence  | 17  | Describe how the strength of the body of evidence will be assessed (such as GRADE)                                                                                                                                                               | 14-15      |

**\* It is strongly recommended that this checklist be read in conjunction with the PRISMA-P Explanation and Elaboration (cite when available) for important clarification on the items. Amendments to a review protocol should be tracked and dated. The copyright for PRISMA-P (including checklist) is held by the PRISMA-P Group and is distributed under a Creative Commons Attribution Licence 4.0.**

*From: Shamseer L, Moher D, Clarke M, Ghersi D, Liberati A, Petticrew M, Shekelle P, Stewart L, PRISMA-P Group. Preferred reporting items for systematic review and meta-analysis protocols (PRISMA-P) 2015: elaboration and explanation. BMJ. 2015 Jan 2;349(jan02 1):g7647.*

## Appendix 2: Definitions and/or examples of components regarding outcomes of interest

| Nursing subsystems               | Dimensions/Indicators               | Definition and/or examples of components                                                                                                                                                                                                     | References                    |
|----------------------------------|-------------------------------------|----------------------------------------------------------------------------------------------------------------------------------------------------------------------------------------------------------------------------------------------|-------------------------------|
| Nursing resources (structure)    | Nursing staff supply                | The effectiveness of diverse activities that govern nursing staff intake (planning, recruitment, selection) and deployment; must ensure an adequate balance with the demand for nursing services.                                            | [1]Dubois et al. 2013         |
|                                  | <i>Quantity</i>                     | Total number of workers in defined occupational groups; nurse-patient ratios.                                                                                                                                                                | [2]Dubois et al. 2009         |
|                                  | <i>Quality</i>                      | Professional backgrounds, skills, job title, qualifications, expertise and experience in order to achieve optimal patient care.                                                                                                              | [1,2]Dubois et al. 2013; 2009 |
|                                  | <i>Skill mix</i>                    | Role enhancement (e.g expanding scope of practice, developing new competencies and assuming new responsibilities), role enlargement (e.g diversification and expansion of nurses' skill repertoires), role substitution and role delegation. | [2]Dubois et al. 2009         |
|                                  | Time and efficiency                 | Time devoted to perform general and specific tasks related to direct or indirect care.                                                                                                                                                       | [3]Rouleau et al. 2017        |
|                                  | <i>Time management</i>              | Time devoted to perform a task (in general). For instance, using e-learning intervention could be "time consuming" or "time saving".                                                                                                         | [3]Rouleau et al. 2017        |
|                                  | <i>Time spent with patient care</i> | Time allocated to patient care discussed with the use of e-learning interventions.                                                                                                                                                           | [3]Rouleau et al. 2017        |
|                                  | <i>Documentation time</i>           | Time allocated to document nurses' activities.                                                                                                                                                                                               | [3]Rouleau et al. 2017        |
| Management of working conditions |                                     | Depends on resources and employment characteristics.                                                                                                                                                                                         | [1]Dubois et al. 2013         |

|                               |                                                       |                                                                                                                                                                                                                                                             |                        |
|-------------------------------|-------------------------------------------------------|-------------------------------------------------------------------------------------------------------------------------------------------------------------------------------------------------------------------------------------------------------------|------------------------|
| Nursing resources (structure) | <i>Physical, material and technological resources</i> | Different types of material resources (e.g. physical facilities, technologies, financial resources, organizational configurations) that are required to support nurses in the performance of their roles.                                                   | [1]Dubois et al. 2013  |
|                               | <i>Employment conditions</i>                          | Employment characteristics such as workload, scheduling, overtime, employment status, labour relationships.                                                                                                                                                 | [1]Dubois et al. 2013  |
|                               | Nursing staff maintenance                             | Depends on various factors such as quality of life at work and satisfaction or dissatisfaction with working conditions.                                                                                                                                     | [1]Dubois et al. 2013  |
|                               | <i>Health and quality of life at work</i>             | E.g. Work-related accidents, illnesses, injuries                                                                                                                                                                                                            | [1]Dubois et al. 2013  |
|                               | <i>Satisfaction with working conditions</i>           | E.g. Job satisfaction or dissatisfaction related to working conditions                                                                                                                                                                                      | [1]Dubois et al. 2013  |
|                               | <i>Absenteeism</i>                                    | Can be caused by many factors                                                                                                                                                                                                                               | [1]Dubois et al.2013   |
|                               | <i>Retention/Turnover</i>                             | Capacity to recruit new nurses and retain those already employed.                                                                                                                                                                                           | [1]Dubois et al. 2013  |
| Nursing services              | Nurse practice environment                            | E-learning can be seen as way to support nursing work and create a professional practice environment for nurses.                                                                                                                                            | [4]Lake, 2002          |
|                               | <i>Information quality and access</i>                 | The use of e-learning interventions could improve or alter information quality and access regarding for example patient issues, clinical data, medication information/profile, and other information (policies, guidelines, drug resources, patient files). | [3]Rouleau et al. 2017 |
|                               | <i>Nurse autonomy in their role</i>                   | Shared governance, nursing responsibility, authority, accountability.                                                                                                                                                                                       | [5]Currie et al. 2005  |
|                               | <i>Intra and interprofessional collaboration</i>      | Communication and collaboration among nursing staff; collegiality between nurses and other professional groups.                                                                                                                                             | [1]Dubois et al. 2013  |
|                               | <i>Decentralization of decision-making</i>            | Decentralization of decision-making with responsibilities for nursing services devoted to the nursing unit.                                                                                                                                                 | [1]Dubois et al. 2013  |
|                               | <i>Support from co-workers and managers</i>           | E.g. A supervisory staff that is supportive (or not) of the nurses.                                                                                                                                                                                         | [4]Lake, 2002          |

|                  |                                                 |                                                                                                                                                                                                                                                                                                                                                                                                                                                                                                      |                        |
|------------------|-------------------------------------------------|------------------------------------------------------------------------------------------------------------------------------------------------------------------------------------------------------------------------------------------------------------------------------------------------------------------------------------------------------------------------------------------------------------------------------------------------------------------------------------------------------|------------------------|
| Nursing services | Nursing processes                               | Are linked to what nurses do (nursing interventions).                                                                                                                                                                                                                                                                                                                                                                                                                                                | [1]Dubois et al. 2013  |
|                  | <i>Quality of documentation</i>                 | The extent to which e-learning interventions could improve or alter the quality of documentation regarding, for example, patient care and nursing activities.                                                                                                                                                                                                                                                                                                                                        | [3]Rouleau et al. 2017 |
|                  | <i>Learning</i>                                 | Acquisition of declarative (knows) and procedural knowledge (knows how), described in a general way.                                                                                                                                                                                                                                                                                                                                                                                                 | [5]Moore et al. 2009   |
|                  | <i>Nurses competencies and skills</i>           | E.g. Decision support/decision-making, observation skills, clinical judgment, critical thinking.                                                                                                                                                                                                                                                                                                                                                                                                     | [3]Rouleau et al. 2017 |
|                  | <i>Nurse-patient relationship</i>               | E.g. The use of e-learning interventions to create pathways for communication, new types of bonds between nurses and patients, establish trust, create a sense of connection.                                                                                                                                                                                                                                                                                                                        | [3]Rouleau et al. 2017 |
|                  | <i>Assessment, care planning and evaluation</i> | Assess patient's physical and mental condition, taking biopsychosocial aspects into consideration. Evaluate and update, in writing, information about the patient's condition and the care provided in the therapeutic nursing plan, nurses' notes, etc. Plan interventions using healthcare assessment tools (pain scale, wound assessment tool). Involve the patient and the patient's family in care planning. The nurse participates in designing, applying, and updating patient care programs. | [6]D'Amour et al. 2012 |
|                  | <i>Teaching of patients and families</i>        | Assess the specific information and education needs of each patient and his/her family. Verify that the patient and family have understood the teaching provided. Use teaching strategies that are adapted to each patient and family in accordance with the patient's level of autonomy. Check the quality of patient education provided on the unit.                                                                                                                                               | [6]D'Amour et al. 2012 |

|                  |                                             |                                                                                                                                                                                                                                                                                                                                                                                                                                                                     |                                               |
|------------------|---------------------------------------------|---------------------------------------------------------------------------------------------------------------------------------------------------------------------------------------------------------------------------------------------------------------------------------------------------------------------------------------------------------------------------------------------------------------------------------------------------------------------|-----------------------------------------------|
| Nursing services | <i>Communication and care coordination</i>  | Communicate to members of the team all information that could affect the coordination of care.<br>Coordinate the work of the nursing team to meet the needs of the patient and family as well as the interventions of the interprofessional team. Convey all relevant information to healthcare professionals in other institutions in order to ensure continuity of care. Participate in interprofessional team meetings or activities. Ensure continuity of care. | [6]D'Amour et al. 2012                        |
|                  | <i>Knowledge updating and utilization</i>   | Keep knowledge up-to-date. Improve nursing practice based on new knowledge derived from best practices and research in nursing science or in health. Knowledge exchange with the nursing team knowledge emerging from research. Different types of knowledge exist, such as declarative knowledge (know), procedural knowledge (know how to do something) and competence (know how).                                                                                | [5,6] D'Amour et al. 2012; Moore et al., 2009 |
|                  | <i>Integration and supervision of staff</i> | Participate in identifying in-service education needs in workplace. Being involved in the orientation and training of nursing students or of newly hired staff. Act as a mentor or educator for newly hired staff. Develop and conduct training activities for the care team, in accordance with nurses skills.                                                                                                                                                     | [6]D'Amour et al. 2012                        |
|                  | <i>Quality of care and patient safety</i>   | Report clinical situations in which deficiencies in quality and safety of care are identified, and propose courses of action to improve them. Improve the quality and safety of care by updating practices. Be a part in the evaluation of quality and safety of care and in developing nursing practice.                                                                                                                                                           | [6]D'Amour et al. 2012                        |
|                  | <i>Problem and symptoms management</i>      | Nursing interventions intended to have effect on symptoms management, such as pain and fatigue (e.g. evaluation, use of non pharmacological approaches, patients' education)                                                                                                                                                                                                                                                                                        | [7]Dubois et al. 2015                         |

|                            |                                                                |                                                                                                                                                                                                                                                                                                                                                                                      |                        |
|----------------------------|----------------------------------------------------------------|--------------------------------------------------------------------------------------------------------------------------------------------------------------------------------------------------------------------------------------------------------------------------------------------------------------------------------------------------------------------------------------|------------------------|
| Nursing services           | <i>Promotion/prevention</i>                                    | Nursing interventions intended to promote health-related behaviours in order to prevent disease or the apparition of complications. For example: interventions for preventing falls among elderly people, for preventing pressure ulcers, vaccination, smoking cessation interventions, etc.                                                                                         | [7]Dubois et al. 2015  |
|                            | <i>Hospital community integration and discharge planning</i>   | Care organization, resources planning depending of patients' health status when they leave the hospitals                                                                                                                                                                                                                                                                             | [7]Dubois et al. 2015  |
|                            | Professional satisfaction                                      | Resulting from nursing processes and from specific aspects that influence their perception of their ability to accomplish their daily assignments and enjoy the work itself.                                                                                                                                                                                                         | [1]Dubois et al. 2013  |
|                            | <i>Nurses perspectives of the quality of care provided</i>     | According the nurses' perspectives, the way they evaluate the quality of care they provided. For example: improvement (or not) of quality of care and patient safety, nurses' perceptions that technologies reduce medication errors and improve medication administration processes, the provision of comprehensive and adaptive care related to the patients' needs.               | [3]Rouleau et al. 2017 |
|                            | <i>Nurses satisfaction or dissatisfaction using e-learning</i> | Overall acceptance of e-learning interventions, and their satisfaction with them described in general way (e.g. their degree of satisfaction or dissatisfaction). Other elements to consider: system navigability (e.g. complexity, ease of use, user-friendliness, and flexibility), nurses' attitudes, concerns about patients' privacy, and perceived benefits or inconveniences. | [3]Rouleau et al. 2017 |
| Nursing sensitive outcomes | Nursing sensitive outcomes                                     | The desirable end result of the interactions between nursing resources (structure) and nursing services (processes) is to improve patients' conditions.                                                                                                                                                                                                                              | [1]Dubois et al. 2013  |
|                            | <i>Patient experience</i>                                      | Patients' perspectives about care received, for example, in terms on care continuity, engagement in care, respect of their preferences, quality of communication with healthcare professionals, etc.                                                                                                                                                                                 | [1]Dubois et al. 2013  |

|                              |                                                                    |                                                                                                                                                                                                                                                                                                                                                                                                                         |                        |
|------------------------------|--------------------------------------------------------------------|-------------------------------------------------------------------------------------------------------------------------------------------------------------------------------------------------------------------------------------------------------------------------------------------------------------------------------------------------------------------------------------------------------------------------|------------------------|
| Change in patients' outcomes | <i>Patient comfort and quality of life related to care</i>         | Nursing system performance reflects the extent to which patients' needs in relation to personal hygiene, nutrition, management of symptoms (pain, dyspnea), and continence are met, unnecessary interventions (physical or chemical restraints, nasogastric tubes, prolonged use of urinary catheters) are avoided, and patients' respect is ensured throughout the episode of care.                                    | [1]Dubois et al. 2013  |
|                              | <i>Patient empowerment</i>                                         | Ability to achieve appropriate self-care. Adoption of health-promoting behaviours.                                                                                                                                                                                                                                                                                                                                      | [1]Dubois et al. 2013  |
|                              | <i>Patient functional status</i>                                   | This category of indicators covers essential end results and benefits that reflect what happens in people's lives as a result of nursing care interventions. In the models examined, these indicators encompass diverse aspects of patients' general functional status and conditions, including physical, psychosocial and cognitive status, as well as recovery of initial health status and nutritional status.      | [1]Dubois et al. 2013  |
|                              | <i>Risk outcomes and safety</i>                                    | Safety-related outcomes considered potentially sensitive to nursing: patient falls, injuries, medication errors, pulmonary infections, pressure ulcers, urinary tract infections, intravenous infections, abuses, and failure to rescue.                                                                                                                                                                                | [1]Dubois et al. 2013  |
|                              | <i>Patient satisfaction or dissatisfaction of using e-learning</i> | Patient results indicated their degree of satisfaction/dissatisfaction with e-learning interventions, their acceptance, acceptability, and receptiveness of their usage of interventions. Usefulness (or uselessness), perceived and actual benefits/advantages, such as accessibility and flexibility, ease of use, usability, complexity, level of confidence in using e-learning interventions, the confidentiality. | [3]Rouleau et al. 2017 |



## References

- 1 Dubois C-A, D'Amour D, Pomey M-P, *et al.* Conceptualizing performance of nursing care as a prerequisite for better measurement: a systematic and interpretive review. *BMC Nurs* 2013;**12**:7. doi:10.1186/1472-6955-12-7
- 2 Dubois C-A, Singh D. From staff-mix to skill-mix and beyond: towards a systemic approach to health workforce management. *Hum Resour Health* 2009;**7**:87. doi:10.1186/1478-4491-7-87
- 3 Rouleau G, Gagnon M-P, Côté J, *et al.* Impact of Information and Communication Technologies on Nursing Care: Results of an Overview of Systematic Reviews. *J Med Internet Res* 2017;**19**:e122. doi:10.2196/jmir.6686
- 4 Lake ET. Development of the practice environment scale of the nursing work index†‡. *Res Nurs Health* 2002;**25**:176–88. doi:10.1002/nur.10032
- 5 Moore DE, Green JS, Gallis HA. Achieving desired results and improved outcomes: integrating planning and assessment throughout learning activities. *J Contin Educ Health Prof* 2009;**29**:1–15. doi:10.1002/chp.20001
- 6 D'Amour D, Dubois C-A, Déry J, *et al.* Measuring Actual Scope of Nursing Practice: A New Tool for Nurse Leaders. *J Nurs Adm* 2012;**42**:248–55. doi:10.1097/NNA.0b013e31824337f4
- 7 Dubois C-A, D'Amour D, Brault I, *et al.* Indicateurs prioritaires pour évaluer la contribution infirmière à la qualité des soins : revue systématique des écrits. Montréal, CA: 2015.

### Appendix 3: Search strategy planned for PubMed

From January 1, 2006 to January 26, 2017

“registered nurse” [TIAB] OR nurse’s role [MeSH] OR nursing practice [TIAB] OR nurs\* [TIAB] OR nursing [MeSH] OR “nursing diagnostics” [MeSH] or nursing care [MeSH] or Evidence-based nursing [MeSH] or “advanced practice nursing” [MeSH] or “nursing assessment” [MeSH] OR “practice patterns, nurses” [MeSH] OR “education, nursing, continuing” [MeSH] OR “health care profession\*” [TIAB] OR “health profession” [TIAB] OR “health-care professional” [TIAB] OR “healthcare education” [TIAB]

AND

“mLearning” [TIAB] OR “m-learning” [TIAB] OR “mobile learning” [TIAB] or “web-based learning” [TIAB] or “web based learning” [TIAB] OR “internet based learning” [TIAB] OR “internet-based learning” [TIAB] or “eLearning” [TIAB] or “e-learning” [TIAB] or “electronic learning” [TIAB] OR “health, education” [MeSH] OR “eLearning in health” [TIAB] or “multi-media learning tool\*” [TIAB] or “multimedia learning tool\*” [TIAB] OR “multimedia instruction” [TIAB] OR “interactive learning” [TIAB] OR “online learning” [TIAB] or “online discussion board\*” [TIAB] OR “exchange portal” [TIAB] or electronic mail [MeSH] OR smartphone [MeSH] OR cellular phone [MeSH] OR “computers, handheld” [MeSH] “internet-mediated videoconferencing” [TIAB] or “virtual learning environment” [TIAB] OR “learning management system” [TIAB] OR “education, distance” [MeSH] OR “distance learning” [TIAB] OR “distance education” [TIAB] OR Self Directed Learning [MeSH] OR “blended learning” [TIAB]

OR

“Life-long learning” [TIAB] OR “lifelong learning” [TIAB] OR “continuing, education” [MeSH] OR “continuing professional development” [TIAB] OR “education, professional” [MeSH] OR “Professional Development” [MeSH]

AND

(systematic[sb] OR meta-analysis[pt] OR meta-analysis as topic[mh] OR meta-analysis[mh] OR meta analy\*[tw] OR metanaly\*[tw] OR metaanaly\*[tw] OR metanaly\*[tw] OR integrative research[tiab] OR integrative review\*[tiab] OR integrative overview\*[tiab] OR research integration\*[tiab] OR research overview\*[tiab] OR collaborative review\*[tiab] OR collaborative overview\*[tiab] OR systematic review\*[tiab] OR technology assessment\*[tiab] OR technology overview\*[tiab] OR "Technology Assessment, Biomedical"[mh] OR HTA[tiab] OR HTAs[tiab] OR comparative efficacy[tiab] OR comparative effectiveness[tiab] OR outcomes research[tiab] OR indirect comparison\*[tiab] OR ((indirect treatment[tiab] OR mixed-treatment[tiab]) AND comparison\*[tiab]) OR Embase\*[tiab] OR Cinahl\*[tiab] OR

1  
2  
3  
4 systematic overview\*[tiab] OR methodological overview\*[tiab] OR methodologic  
5 overview\*[tiab] OR methodological review\*[tiab] OR methodologic review\*[tiab] OR  
6 quantitative review\*[tiab] OR quantitative overview\*[tiab] OR quantitative  
7 synthes\*[tiab] OR pooled analy\*[tiab] OR Cochrane[tiab] OR Medline[tiab] OR  
8 Pubmed[tiab] OR Medlars[tiab] OR handsearch\*[tiab] OR hand search\*[tiab] OR meta-  
9 regression\*[tiab] OR metaregression\*[tiab] OR data synthes\*[tiab] OR data  
10 extraction[tiab] OR data abstraction\*[tiab] OR mantel haenszel[tiab] OR peto[tiab] OR  
11 der-simonian[tiab] OR dersimonian[tiab] OR fixed effect\*[tiab] OR "Cochrane Database  
12 Syst Rev"[Journal: \_\_jrid21711] OR "health technology assessment winchester,  
13 england"[Journal] OR "Evid Rep Technol Assess (Full Rep)"[Journal] OR "Evid Rep  
14 Technol Assess (Summ)"[Journal] OR "Int J Technol Assess Health Care"[Journal] OR  
15 "GMS Health Technol Assess"[Journal] OR "Health Technol Assess (Rockv)"[Journal]  
16 OR "Health Technol Assess Rep"[Journal])  
17  
18  
19  
20  
21  
22  
23  
24  
25  
26  
27  
28  
29  
30  
31  
32  
33  
34  
35  
36  
37  
38  
39  
40  
41  
42  
43  
44  
45  
46  
47  
48  
49  
50  
51  
52  
53  
54  
55  
56  
57  
58  
59  
60

# BMJ Open

## Effects of e-learning in a continuing education context on nursing care: a review of systematic qualitative, quantitative and mixed studies reviews (protocol)

|                                 |                                                                                                                                                                                                                                                                                                                                                                                                                                                                                                                                                                                                                                                                                                                                                                                                                                                                                                                                                                                                            |
|---------------------------------|------------------------------------------------------------------------------------------------------------------------------------------------------------------------------------------------------------------------------------------------------------------------------------------------------------------------------------------------------------------------------------------------------------------------------------------------------------------------------------------------------------------------------------------------------------------------------------------------------------------------------------------------------------------------------------------------------------------------------------------------------------------------------------------------------------------------------------------------------------------------------------------------------------------------------------------------------------------------------------------------------------|
| Journal:                        | <i>BMJ Open</i>                                                                                                                                                                                                                                                                                                                                                                                                                                                                                                                                                                                                                                                                                                                                                                                                                                                                                                                                                                                            |
| Manuscript ID                   | bmjopen-2017-018441.R1                                                                                                                                                                                                                                                                                                                                                                                                                                                                                                                                                                                                                                                                                                                                                                                                                                                                                                                                                                                     |
| Article Type:                   | Protocol                                                                                                                                                                                                                                                                                                                                                                                                                                                                                                                                                                                                                                                                                                                                                                                                                                                                                                                                                                                                   |
| Date Submitted by the Author:   | 26-Aug-2017                                                                                                                                                                                                                                                                                                                                                                                                                                                                                                                                                                                                                                                                                                                                                                                                                                                                                                                                                                                                |
| Complete List of Authors:       | Rouleau, Geneviève; Université Laval, Faculty of Nursing Sciences; University of Montreal Hospital Research Centre (CRCHUM), Research Chair in Innovative Nursing Practices<br>Gagnon, Marie-Pierre; Université Laval, Faculty of Nursing Sciences; CHU de Québec Research Center, St.-François d'Assise Hospital<br>Côté, José; University of Montreal Hospital Research Centre (CRCHUM), Research Chair in Innovative Nursing Practices; Université de Montréal, Faculté des Sciences Infirmières<br>Payne-Gagnon, Julie; CHU de Québec Research Center, St.-François d'Assise Hospital<br>Hudson, Emilie; McGill University, Ingram School of Nursing; University of Montreal Hospital Research Centre (CRCHUM), Research Chair in Innovative Nursing Practices<br>Bouix-Picasso, Julien; Université de Montréal, Faculté des Sciences Infirmières; Université Paris 13-Sorbonne, Department of Health Sciences Pedagogy<br>Dubois, Carl-Ardy; Université de Montréal, Faculté des Sciences Infirmières |
| <b>Primary Subject Heading</b>: | Nursing                                                                                                                                                                                                                                                                                                                                                                                                                                                                                                                                                                                                                                                                                                                                                                                                                                                                                                                                                                                                    |
| Secondary Subject Heading:      | Medical education and training, Health informatics                                                                                                                                                                                                                                                                                                                                                                                                                                                                                                                                                                                                                                                                                                                                                                                                                                                                                                                                                         |
| Keywords:                       | e-learning, continuing education, nursing care, nurses, review, review of review                                                                                                                                                                                                                                                                                                                                                                                                                                                                                                                                                                                                                                                                                                                                                                                                                                                                                                                           |
|                                 |                                                                                                                                                                                                                                                                                                                                                                                                                                                                                                                                                                                                                                                                                                                                                                                                                                                                                                                                                                                                            |

SCHOLARONE™  
Manuscripts

1  
2  
3  
4  
5 **Effects of e-learning in a continuing education context on nursing care: a**  
6 **review of systematic qualitative, quantitative and mixed studies reviews**  
7 **(protocol)**  
8  
9

10  
11 \*Geneviève Rouleau<sup>1,2</sup>

12 Marie-Pierre Gagnon<sup>1,3</sup>

13  
14 José Côté<sup>2,4</sup>

15  
16 Julie Payne-Gagnon<sup>3</sup>

17  
18 Emilie Hudson<sup>2,5</sup>

19  
20 Julien Bouix-Picasso<sup>4,6</sup>

21  
22 Carl-Ardy Dubois<sup>4</sup>

23  
24  
25  
26 1- Faculty of Nursing, Université Laval, Pavillon Ferdinand-Vandry, Quebec City (QC),  
27 Canada.

28  
29  
30 2- Research Center of the Centre Hospitalier de l'Université de Montréal, Montreal (QC),  
31 Canada.

32  
33 3- CHU de Québec Research Center, St.-François d'Assise Hospital, Quebec City (QC),  
34 Canada.

35  
36  
37 4- Faculty of Nursing, Université de Montréal, Pavillon Marguerite-d'Youville. Montréal  
38 (QC), Canada.

39  
40 5- Ingram School of Nursing, McGill University, Montreal (QC), Canada.

41  
42 6- Department of Health Sciences Pedagogy, Université Paris 13-Sorbonne, Paris, France.

43  
44  
45 \*Corresponding author

46  
47 Geneviève Rouleau, University of Montreal Hospital Research Centre, 850 rue St-Denis,  
48 Tour St-Antoine, 3<sup>rd</sup> floor, Door S03-424, Montreal (QC), Canada, H2X 0A9. Phone number:  
49 1-514-890-8000 ext. 12744 genevieve.rouleau.chum@ssss.gouv.qc.ca  
50  
51

52 Words count: 4031  
53  
54  
55  
56  
57  
58  
59  
60

## Abstract

**Introduction:** Continuing education (CE) is imperative to the future of professional nursing. The use of e-learning by registered nurses (RN) for CE is spreading. A review of systematic reviews will be conducted to develop a broad picture of the effects of e-learning in a CE context on nursing care.

**Methods and analysis:** Systematic qualitative, quantitative and mixed studies reviews published in English, French, or Spanish from 1 January 2006 will be included. The outcomes of interest will be extracted and analyzed inductively and deductively from the Nursing Care Performance Framework (NCPF); some themes include nursing resources, nurses' practice environment, processes, professional satisfaction, and nursing sensitive outcomes. Two reviewers will independently screen first the title and abstract of the papers, and then the full texts in order to assess eligibility. Two teams of two reviewers will extract the selected reviews' characteristics and data. The results from various types of reviews will be integrated using a data-based convergent synthesis design. We will conduct a thematic synthesis and transform all quantitative and mixed data into qualitative data.

**Ethics and dissemination:** Ethics approval is not required for review of systematic reviews. We will summarize evidence concerning the negative, neutral and positive effects of various forms of e-learning on different aspects of nursing care. If we find gaps in the literature, we will highlight them and suggest ideas for further research. We will also focus on positive effects and present, if possible, the components and characteristics of e-learning interventions that were found to be successful. We will present this protocol and results in international conference in Nursing and in Medical and Health Informatics domains. We will also submit the results of our work for peer-review publication in a journal indexed in the international bibliographic database of biomedical information. (293 words)

## Keywords

e-learning; nursing care; nurses, review; review of review ; continuing education;

## Strengths and limitations of this study

- Review of systematic qualitative, quantitative and mixed studies reviews is an innovative and emerging type of research synthesis. The inclusion of reviews using multiple research designs and a diversity of data is justified by the possibility of broadening the repertoires of effects of e-learning on nursing care.
- To the best of our knowledge, this is the first review of systematic reviews that uses the Nursing Care Performance Framework to draw a broad, multidimensional and systems-based perspective on the dimensions and indicators of nursing care that can be impacted by e-learning interventions.
- Review of systematic reviews is still in its infancy regarding reporting, assessment of methodological quality, risks of bias, and quality of evidence, especially for the qualitative and mixed studies reviews.
- One of the limits of reviews of systematic reviews is the lack of granularity of information provided by the review authors.

## INTRODUCTION

Continuing education (CE), a term often used interchangeably with continuing professional development (CPD), lifelong learning, and staff development [1], is an imperative for the future of professional nursing [2]. In many countries CE is mandated by professional or regulatory bodies, which encourages nurses to participate in these activities [3]. CE is an opportunity to acquire knowledge, improve performance, support growth and development as a nursing profession, expand the nursing role, and introduce, develop, and advance professional competencies/skills [3,4]. Ultimately, CE is intended to improve quality of care and patients' health status due to changes in healthcare provider practice [5].

Nurses may engage in CE activities for myriad reasons; some seek opportunities voluntarily whereas others complete CE credits for specialization or licensure. While there is a breadth of nursing-specific CE activities, nurses searching for CE may face many barriers in terms of work schedule/commitments, lack of support (from co-workers, employers, organization), geographic distance, time away from work, and activity cost [6–8]. The use of

1  
2  
3 electronic (e.g. computer and web-based) and mobile devices (e.g. smartphone, tablets) to  
4 support learning (i.e. e-learning and m-learning) is a promising avenue to face these  
5  
6 challenges.  
7  
8

9  
10 E-learning is an umbrella term that encompasses various concepts and technologies  
11 related to learning, such as distance, digital, electronic, online, Web-based and mobile  
12 learning [9]. For this work, we will use “e-learning” as the terminology entailing a variety of  
13 electronic, digital or mobile devices used to support learning. E-learning has many  
14 advantages: it reduces travel time, is flexible and accessible, can be cost-effective, and can  
15 allow learners to learn at their own pace and from the place of their choice [10,11].  
16  
17 Furthermore, e-learning has the potential to provide tailored content and instructional  
18 methods based on the individual needs of learners, and can present a variety of multimedia  
19 components such as text, audio, still and motion visuals to support acquisition of knowledge  
20 and skills [10]. Even if there is no strong evidence to prove that e-learning is superior to  
21 traditional learning, results of systematic reviews support that this is an effective alternative  
22 way to learn [11–13]. Moreover, it has positive impacts on nurses’ knowledge, skills, level of  
23 self-efficacy and satisfaction [13,14].  
24  
25

26  
27 However, e-learning is not a panacea [15]. Learners can encounter barriers, like skill  
28 requirement for using a particular device, low level of technological literacy, loss of time  
29 when the system/device doesn’t work properly, or the reduction of social contact compared to  
30 face-to-face learning [16,17]. Clark and Mayer [10] summarized drawbacks surrounding e-  
31 learning, including too many multimedia components interacting at the same time, a lack of  
32 features that promote learning, a loss of an exploratory learning environment, and a lack of  
33 guidance for learners. The authors highlighted an interesting point: learning is better  
34  
35  
36  
37  
38  
39  
40  
41  
42  
43  
44  
45  
46  
47  
48  
49  
50  
51  
52  
53  
54  
55  
56  
57  
58  
59  
60



1  
2  
3 supported by effective instructional methods than by delivery medium (e.g. virtual classroom,  
4 face-to-face classroom). Furthermore, we have to keep in mind that the process of knowledge  
5 translation into clinical practice is embedded in a complex and challenging phenomenon,  
6  
7  
8 which can be influenced by various elements such as: the nature of knowledge to be  
9  
10 transferred, the expected outcomes of the educational intervention, the way the knowledge is  
11  
12 transferred (e.g. the instructional methods/implementation strategies, the use of tailored and  
13  
14 individualized educational approaches, the medium) and the target audience [18].  
15  
16  
17  
18  
19

20 E-learning technologies have been studied extensively in nursing, especially for  
21  
22 students in an academic context, as supported in a review of systematic reviews (n=22)  
23  
24 [9,12]. The results of this review did not lead to robust evidence of the superiority of e-  
25  
26 learning over traditional learning, nor did they conclude which technology or medium of e-  
27  
28 learning best influenced the acquisition of skills and knowledge for nursing students at  
29  
30 undergraduate and postgraduate levels. However, e-learning was shown to reduce the cost  
31  
32 related to education and save time for students and lecturers. To the best of our knowledge,  
33  
34 there is no review of reviews that focuses on e-learning in a CE context for registered nurses  
35  
36 (RN).  
37  
38  
39  
40  
41  
42  
43

## 44 **Objective**

45  
46 The objective of this review of systematic reviews (SRs) is to systematically summarize  
47  
48 the best evidence that comes from systematic qualitative, quantitative and mixed studies  
49  
50 reviews (MSRs) regarding the effects of e-learning in a nursing CE context on nursing care  
51  
52 (i.e resources, services and patients' outcomes). We used the terminology "review of  
53  
54 systematic reviews" because it describes the concept in a simple and specific manner. Other  
55  
56 terms are less specific, such as 'overview', which can be used in a generic way [19].  
57  
58  
59  
60

1  
2  
3 To meet this objective, we will use a process of data conceptualization by mobilizing  
4 both inductive (data-driven) and deductive (theory-driven) approaches iteratively or  
5 simultaneously to guide all the methods and analysis processes. We will be open-minded to  
6 allow the emergence of new concepts, but we will also use concepts from an existing  
7 framework, the Nursing Care Performance Framework (NCPF)[20], as a tool to extract,  
8 synthesize and interpret data. The NCPF is useful to define an important concept of this  
9 review, namely, “nursing care”.

### 20 **Why it is important to do this review of systematic reviews**

- 22 • The context of nursing education in an academic setting versus in a workplace setting  
23 as a CE opportunity is different. Undergraduate students engage in the process of  
24 learning a large repertoire of clinical competencies, whereas practicing nurses in a CE  
25 context maintain and reinforce their clinical expertise.
- 26 • Knowledge synthesis at the third level of research (i.e. review of SRs) about the  
27 effects of e-learning already exists in an academic context, but there is no one  
28 exclusively on nursing workplace and CE.
- 29 • To complement existing nursing knowledge, we believe that it could be useful to use  
30 a review of SRs with an exploratory lens, as suggested by Caird et al.[21]. The  
31 synthesis it provides is ideal for identifying existing e-learning interventions used by  
32 RN in their workplace settings, and possible outcomes of interest (based on the  
33 NCPF) and their effects (i.e. positive, no effect, or negative effects). NCPF has never  
34 been used as a framework to extract and analyze data for educational interventions  
35 among nurses.

## NURSING CARE PERFORMANCE FRAMEWORK

The NCPF [20] will be used to conceptualize how e-learning interventions could influence nursing care and impact health outcomes. This is an organizational model, originally composed of three subsystems, 14 dimensions and 51 indicators, from which we have juxtaposing elements of the actual scope of nursing practice [22] as well as findings from our previous work [23] carrying out the impact of information and communication technologies (ICTs) on nursing care. Figure 1 presents the adapted version of the NCPF, which represents the range of possible outcomes for which data will be sought in this review of SRs.

*Insert Figure 1 here*

The NCPF demonstrates how the interplay of three nursing subsystems (structure, services, and patients' outcomes) can operate to achieve three key functions: (1) acquiring, deploying, and maintaining nursing resources (structure); (2) transforming nursing resources into nursing services (processes); and (3) producing changes in patients' conditions in response to the nursing services provided ("nursing-sensitive outcomes" or patients' outcomes).

The first function refers to the human and material resources needed to provide effective nursing care, such as nursing staff supply, working conditions, staff maintenance, and economic sustainability. The first way e-learning could influence nursing care is by considering it as a resource (i.e. the first subsystem of the NCPF). We could pay attention to these elements when we extract data from SRs: exploring whether the availability of e-learning in healthcare settings impacts the quality of life at work for nurses, and if e-learning acts as facilitator/motivator to enhance nurses' working conditions, or serve as a barrier that

1  
2  
3 inhibits them. Another question could be: to what extent can e-learning create favourable  
4  
5 conditions that attracts nurses and reinforces stability in the workforce?  
6  
7

8 The second function encompasses nursing services (i.e. the second subsystem of the  
9  
10 NCPF), which are defined in various dimensions: nurses' practice environments (e.g. nurse  
11  
12 autonomy; collaboration), nursing processes (e.g. assessment, care planning, and evaluation;  
13  
14 problems and symptom management), nurses' professional satisfaction and patient  
15  
16 experience. E-learning can be viewed as a resource that has the potential to influence all  
17  
18 dimensions of nursing services at different levels. E-learning can be seen as way to support  
19  
20 nursing work and create a professional practice environment for nurses by, for instance,  
21  
22 facilitating collaborative practice. E-learning could impact what nurses do, for instance  
23  
24 nursing interventions (processes), or the ability of nurses in using their competencies to  
25  
26 provide healthcare. Resulting from these two dimensions, e-learning could influence nurses'  
27  
28 professional satisfaction in terms of quality of care provided, satisfaction or dissatisfaction of  
29  
30 nurses using e-learning, and/or patient experience.  
31  
32  
33  
34  
35

36 The desirable end result of the interactions between nursing resources and nursing  
37  
38 services is to improve patients' conditions. The third function is then described as the positive  
39  
40 changes that can be detected among patients (also called "nursing-sensitive outcomes", i.e.  
41  
42 the third subsystem of the NCPF). As other models used in the learning [5,24] domain, we  
43  
44 could speculate that if e-learning changes nursing resources and nursing services, patients'  
45  
46 outcomes could be potentially affected. Examples of indicators in the NCPF are: patient  
47  
48 comfort and quality of life, risk outcomes and safety, empowerment and functional status.  
49  
50  
51  
52

53 The NCPF has been chosen to fit in the scope of this review for many reasons: 1) it  
54  
55 was useful as an extraction and analytical tool in previous work [23]; 2) it offers a broad,  
56  
57  
58  
59  
60

1  
2  
3 multidimensional and system-based perspective on the dimensions and indicators of nursing  
4 care that can be impacted by e-learning interventions; 3) it can highlight many indicators that  
5 could be relevant to document and measure ways in which nursing care performance is  
6 impacted by CE.  
7  
8  
9  
10  
11  
12

## 13 14 15 **METHODS**

16  
17 The protocol of this review of SRs has been registered at the International prospective  
18 register of systematic reviews (PROSPERO), registration number CRD42016050714. We  
19 used the Preferred Reporting Items for Systematic Reviews and Meta-Analysis Protocol  
20 (PRISMA-P) checklist to guide the elaboration of this protocol (see online supplementary  
21 appendix 1) [25].  
22  
23  
24  
25  
26  
27  
28

29 *Insert PRISMA-P here*  
30

### 31 32 **Design**

33 We will conduct a review of systematic qualitative, quantitative and MSRs, which is,  
34 to the best of our knowledge, an innovative and emerging type of research synthesis. The  
35 inclusion of reviews using multiple research designs is justified by the possibility of  
36 broadening the repertoires of effects of e-learning on nursing care.  
37  
38  
39  
40  
41  
42

43 As underlined by Lunny et al. [26], methods to conduct, interpret and report review of  
44 SRs are in their infancy. To the best of our knowledge, no unified and integrated tool allows a  
45 comprehensive reporting of a review of systematic qualitative, quantitative and MSRs. We  
46 will follow the general methods for Cochrane reviews [27] and other relevant works in this  
47 domain [26,28,29] to conduct and report the review of SRs.  
48  
49  
50  
51  
52  
53  
54  
55  
56  
57  
58  
59  
60

## Eligibility criteria

The scope in this review of SRs is formulated using PICOS (participants, interventions, comparisons, outcomes, study design) [30,31].

### Type of reviews

We will include all types of systematic qualitative, quantitative and MSRs that evaluate the influence of e-learning used by nurses on nursing care in a CE context that have been published in French, English, or Spanish from January 1, 2006.

### Publication type

To be included, the reviews have to be “systematic” [32] :

- clear and unambiguous
- include a type of research and one or a combination of method(s)
- have specific research question(s), precise inclusion criteria, a comprehensive search strategy, a quality appraisal process, and a rigorous synthesis.

The systematic qualitative, quantitative and MSRs must be published in peer-reviewed journals. Reports that outline a systematic methodology are included. We will exclude grey literature (e.g. conference proceedings, trial registries, dissertations) and non-SRs such as literature reviews.

### Population

We will include RNs according to the professional legislation of each country. Reviews that target RNs and other health professionals (e.g. physicians) will be included as long as it is possible to differentiate nurses and to extract these participants’ data. Patients receiving care from qualified RNs through the medium of e-learning will be part of this work, as long as nursing-related outcomes are discussed. We will exclude undergraduate nursing students in an academic context.

## Intervention

All types of e-learning delivered through different devices are targeted. Blended learning interventions will be included as long as they have an “electronic” or “digital” component. Any types of simulation, including with a “physical” mannequin (e.g. high-fidelity simulation, technology-enhanced simulation) will be excluded. However, simulation could be included if it is done through virtual reality (i.e. in an electronic learning environment).

## Comparisons

We will include these types of comparisons: face-to-face learning, any other e-learning intervention, and blended learning.

## Outcomes

The outcomes will include but are not limited to the three subsystems (i.e. nursing resources, nursing services and nursing sensitive outcomes), dimensions (e.g. working conditions, time and efficiency, nurses’ practice environment, nursing processes, professional satisfaction, nursing sensitive outcome) and indicators (e.g. learning, nurse-patient relationship, knowledge access) showed in the adapted version of the NCPF in Figure 1. Definitions and/or examples of components are presented (see online supplementary appendix 2) related to each outcome of interest. The purpose is not to provide “standardized” definitions but to offer a guidance for the data extraction process. No “standardized” definition is available for the outcome of interest based on the fact that reviews included in this review of SRs may have: diversity in terms of nature of data (qualitative, quantitative and mixed), heterogeneity in e-learning interventions, and various possible outcomes.

Furthermore, the data synthesis approach is abductive. This means that we will use the NCPF

1  
2  
3 as a starting point to extract the data and analyze them, but we will let new data emerge from  
4  
5 the reviews. If stable and fixed definitions are provided, the inductive part can be  
6  
7 compromised.  
8  
9

10 The main outcomes of interests are those targeting the effects of e-learning on nursing  
11  
12 resources and services. Then, if the outcomes belonging to these dimensions are found in the  
13  
14 reviews, patients' outcomes will be extracted.  
15  
16

17 We will exclude reviews that focus only on patients' outcomes without discussing nursing  
18  
19 resources or services. At least one nurse-related outcome need to be present in order to  
20  
21 include a publication. Determinants of e-learning use (e.g. intended use) without reporting  
22  
23 "actual use" of e-learning will also be excluded.  
24  
25  
26

### 27 **Search methods for the identification of reviews**

28  
29 Publications will be searched through general health sciences (PubMed, Embase),  
30  
31 nursing (CINAHL) and Joanna Briggs Institute electronic databases. Structured search  
32  
33 strategies will be developed using the thesaurus terms of each database and using free text,  
34  
35 targeting the "title" and "abstract" fields. The strategies will be adapted to the other  
36  
37 databases. The search strategy will be developed by the research team and validated by a  
38  
39 health information specialist. The results of each database search will be collected in a single  
40  
41 reference database, and duplicate citations will be removed. An example of the search  
42  
43 strategy in PubMed is presented (see online supplementary appendix 3). This strategy will be  
44  
45 adapted and refined according to the specificities of the databases. Furthermore, to obtain  
46  
47 additional reviews, we will hand search for relevant reviews, contact authors to find other  
48  
49 relevant works in this domain, and will consult reference lists of included reviews.  
50  
51  
52  
53  
54  
55  
56  
57  
58  
59  
60



## DATA COLLECTION AND ANALYSIS

### Selection of reviews

The research team will use DistillerSR, a web-based SR software from Evidence Partners (Ottawa, Canada), to perform the overall tasks related to the realization of a review of SRs. Citations retrieved from the searches will be imported into a reference management software such as Endnote. The database containing all the references will then be imported in DistillerSR. Three reviewers (GR, JPG, EH) will independently screen the title and abstract of the papers in order to assess their eligibility. Each paper will be reviewed twice. The reviewers will compare their results, and discuss them in case of discrepancies. If a consensus cannot be reached, arbitration with a third review author will be required. After the first round of screening, full text copies of publications that meet the pre-established inclusion criteria will be retrieved. In cases when the information regarding the eligibility of a review is limited or incomplete (e.g. when only an abstract is available), we will contact authors to request the full text or further details. We will use the Preferred Reporting Items for Systematic Reviews and Meta-Analyses (PRISMA) flow diagram to show the overall process of reviews selection [33].

### Data extraction and management

The coding process will be done by four independent reviewers (GR, JPG, EH, JBP). We will use the NCPF to code, organize and classify the data according to the three subsystems (i.e. resources, services, outcomes), the dimensions and the indicators. This is the deductive part of the synthesis. Additional codes will be generated inductively by the four reviewers from the text of the articles without fitting them into the existing model. The four reviewers will begin by coding a set of the same three articles independently in order to ensure consistency during the coding and data extraction process. The independently

1  
2  
3 developed frameworks or “coding plan” will then be compared and combined into a single  
4  
5 integrated framework [26]. Any conflict arising through this extraction process will be  
6  
7 discussed between the four reviewers. After a general agreement on coding and data  
8  
9 extraction, the remaining articles will be divided equally between two teams of two  
10  
11 reviewers.  
12  
13

14  
15 The four reviewers will summarize general characteristics about reviews: purpose,  
16  
17 type of review (qualitative, quantitative or mixed), examples of topics covered, number of  
18  
19 studies included, target populations, search dates and context (e.g. mandatory CE,  
20  
21 workplace). Details about e-learning interventions, comparisons and outcomes will also be  
22  
23 extracted as follows: examples of e-learning interventions, devices or media used, examples  
24  
25 of educational strategies and material, theory used to develop and evaluate interventions (e.g.  
26  
27 learning theory, behavioural change), examples of comparison interventions, dimensions and  
28  
29 indicators based on adapted version of NCPF, effects of e-learning as reported by authors,  
30  
31 and nature of the effects (qualitative, quantitative or mixed). Any disagreements arising  
32  
33 during the data extraction process will be resolved by discussion and consensus involving the  
34  
35 two reviewers, or will involve a third review author if needed.  
36  
37  
38  
39

#### 40 41 **Methodological quality assessment of included reviews**

42  
43 In this review of SRs, we will include different designs. The array of underlying types  
44  
45 of SRs combining qualitative, quantitative and mixed-method evidence can render reporting  
46  
47 and assessing the quality of reviews of SRs more complex. At the time of this review of SRs,  
48  
49 we found no reporting guidelines on assessing methodological quality of qualitative and  
50  
51 MSRs.  
52  
53

54  
55 One of the most commonly used tools for authors of quantitative SRs using a  
56  
57 randomized controlled trial (RCT) design is the Assessment of Multiple Systematic Reviews  
58  
59

1  
2  
3 (AMSTAR) [34,35]. AMSTAR is an 11-item checklist from which reviewers assign one  
4  
5 point when the criterion is met. Quality is characterized at three levels: 8 to 11 is high quality  
6  
7 (i.e. minor or no methodological limitations), 4 to 7 is medium quality (i.e. moderate  
8  
9 methodological limitations), and 0 to 3 is low quality (i.e. major methodological limitations)  
10  
11 [36]. AMSTAR items provide an assessment of methodological criteria such as the  
12  
13 comprehensiveness of the search strategy and whether the quality of included studies was  
14  
15 evaluated and accounted for [37]. Although AMSTAR has limitations (e.g. inappropriateness  
16  
17 of applying some criteria to mixed-method and qualitative reviews), as underlined in previous  
18  
19 work [23], the four reviewers (GR, JPG, EH, JBP) will apply the tool to all reviews in order  
20  
21 to use the same criteria for quality assessment.  
22  
23  
24  
25  
26

### 27 **Risks of bias and quality of evidence**

28  
29 Others challenges encountered for authors of reviews of SRs are the assessment of  
30  
31 limitations (risk of bias) as well as the quality of evidence in SRs [24, 31]. A tool has been  
32  
33 recently published, named ROBIS, to assess or avoid the risk of bias in SRs [38]. It has been  
34  
35 developed for guideline developers and authors of reviews of SRs. Three steps can be fill in  
36  
37 when using the tool: (1) assessment of relevance (optional) between a review question and its  
38  
39 fit/match with the review of reviews question, (2) identification of research steps where bias  
40  
41 may be introduced into the SR process (i.e. eligibility criteria, identification and selection of  
42  
43 reviews; data collection and review appraisal; and synthesis and findings) and (3) overall  
44  
45 judgement of risk of bias. Bias appears if limitations in the design, conduct or analysis of a  
46  
47 review alter the results. Two reviewers will then assess independently the risk of bias with  
48  
49 ROBIS tool and will compare their results.  
50  
51  
52  
53  
54

55 We found no tool or guidance to perform the quality of evidence assessment for authors  
56  
57 of reviews of SRs. The Grades of Recommendation, Assessment, Development and  
58  
59

1  
2  
3 Evaluation (GRADE) has been largely adopted as a tool to judge the overall quality of  
4  
5 evidence for each individual outcome (i.e. consideration of within-study risk of bias,  
6  
7 directness of evidence, heterogeneity, precision of effect estimates and risk of publication  
8  
9 bias) in the context of quantitative primary studies, especially those using experimental or  
10  
11 quasi-experimental designs [39,40]. When the unit of analysis is SRs and not primary studies,  
12  
13 it is not always possible to extract GRADE ratings because data can be missing, not reported  
14  
15 adequately, or reported in different ways across the SRs. The use of a tool to assess the  
16  
17 quality of evidence has to be modified for use in reviews of SRs [41]. Recently, two tools  
18  
19 have been published to assess both the confidence in qualitative review findings  
20  
21 (methodological quality or dependability) and the potential influence of study quality on the  
22  
23 review findings: Confidence of synthesized qualitative findings, named ConQual [42], and  
24  
25 Confidence in the Evidence from Reviews of Qualitative research, called CERQual [43].  
26  
27 They both aim to provide a qualitative equivalent to the GRADE approach and both present a  
28  
29 final ranking [44], but they are not currently considered as gold standard. We found no tool to  
30  
31 assess the quality of evidence in mixed studies reviews. In this review of SRs, we will report  
32  
33 the assessment of quality of evidence and risk of bias performed by original systematic  
34  
35 quantitative, qualitative and MSRs authors who used GRADE, ConQUAL, CerQUAL or  
36  
37 other approaches. In other words, only the quality indicators used by the authors of the  
38  
39 original reviews will be reported, and no additional evaluation will be done.  
40  
41  
42  
43  
44  
45  
46  
47

48 Finally, another element to consider in a review of SRs is the risk of biased results  
49  
50 caused by the repetition of primary studies that are included more than once (i.e. overlaps)  
51  
52 across the reviews [45]. It is important to calculate the actual degree of overlap in reviews of  
53  
54 SRs with the corrected covered area method in order to report these overlaps properly [45].  
55  
56  
57  
58  
59  
60

1  
2  
3 As suggested by Studzinski *et al* [46], one reviewer will generate a matrix that will cross-link  
4  
5 the SRs (columns) with primary studies included in the reviews (rows), and a second  
6  
7 reviewer will check the matrix.  
8  
9

## 10 **Data synthesis**

11  
12 An important challenge of data synthesis is the integration of the systematic  
13  
14 qualitative, quantitative and MSRs [47]. In order to integrate the results from various types of  
15  
16 reviews, we will perform a qualitative thematic synthesis using a data-based convergent  
17  
18 synthesis design [48,49]. We will qualify quantitative data, as we did in our previous work  
19  
20 [23]. Qualifying the quantitative data means that we will use a textual and narrative approach  
21  
22 to name and qualify the effect. We will then categorize the quantitative effect under a specific  
23  
24 theme (e.g. knowledge use). Within this theme, subthemes may be created, to make a  
25  
26 distinction between qualitative, quantitative and mixed studies reviews' findings. Aromataris  
27  
28 *et al.* [50] suggest to present overall effect estimates, numerical data, and overall synthesized  
29  
30 qualitative findings extracted from each review in a tabular presentation of findings. Under a  
31  
32 theme, subthemes could be divided by type of review (i.e. qualitative, quantitative or MSRs)  
33  
34 to keep the details, and then, an integrated synthesis could be conducted to summarize the  
35  
36 effects.  
37  
38  
39  
40  
41  
42

43  
44 However, if the results of the review demonstrate that e-learning leads to a significant  
45  
46 increase in knowledge, instead of reporting the *p* value, we will qualify the result: positive  
47  
48 effect of e-learning on knowledge level. Frantzen & Fetters [47] call this approach  
49  
50 “transformation”, in which quantitative data are transformed into qualitative data. We will  
51  
52 also organize the results into themes and sub-themes according to the specific dimensions of  
53  
54 nursing care (e.g. practice environment, nursing processes, professional satisfaction, and  
55  
56 nursing-sensitive outcomes) and their corresponding indicators. Even if this is an uncommon  
57  
58  
59  
60

1  
2  
3 approach, we do believe that this way of synthesizing will allow us to keep the richness of the  
4  
5 results.  
6  
7

8 In order to transform all quantitative and mixed data into qualitative data we will  
9  
10 employ Thomas and Harden's [51] approach. We will follow these three steps: (1) coding  
11 relevant extracts of each SR line by line; (2) developing descriptive themes; and (3)  
12  
13 generating analytical themes. This might lead to an adapted version of the NCPF cited earlier.  
14  
15 The thematic synthesis will be done in an inductive and deductive way (i.e. abductive), which  
16  
17 means that some themes will be organized based on the NCPF [23,24,52] while others will  
18  
19 emerge inductively.  
20  
21  
22  
23  
24

## 25 26 CONCLUSION

27 Results of this review of SRs could be used to understand the dimensions of nursing  
28  
29 care that have the potential to be supported, enhanced or constrained by the use of e-learning  
30  
31 to sustain CE activities among nurses. This review is a continuation of previous work that has  
32  
33 been done about the impacts of various types of ICTs (excluding e-learning interventions) on  
34  
35 nursing care [23]. Some reviews on e-learning used by nurses or nursing students target  
36  
37 specific outcomes, especially knowledge, attitudes, barriers and facilitators, skills and  
38  
39 satisfaction regarding the use of e-learning [13,14,53,54]. By using the NCPF to organize,  
40  
41 extract and analyze the data, this review of SRs could provide a good starting point to deepen  
42  
43 our understanding regarding the dimensions and indicators of nursing care that can be  
44  
45 impacted by e-learning. With the growing presence of digital devices in nursing care systems,  
46  
47 we think it is important to document the interaction of e-learning and nursing care  
48  
49 dimensions and indicators. We believe that if we better understand the effects of these e-  
50  
51 learning interventions, we could deploy strategies to facilitate their implementation and  
52  
53  
54  
55  
56  
57  
58  
59  
60

1  
2  
3 integration in nursing care, nursing research, management and education. Consequently, we  
4  
5 could overcome their negative effects and optimize positive ones in order to use them to their  
6  
7 full potential as tools to support nursing practice and, ultimately, improve patient outcomes.  
8  
9

### 10 **Authors' contributions**

11  
12 GR is the guarantor, supervised by MPG and JC. GR drafted the manuscript with input from  
13 MPG and JC. GR, MPG, JC, JPG and EH contributed to the development of the selection  
14 criteria, the quality assessment strategy and data extraction criteria. GR and MPG  
15 participated in the development of the search strategy. CAD provided expertise on the  
16 application of the NCPF as the first author of the framework. JBP contributed to integrate  
17 relevant references in e-learning and in methodological quality assessment. GR and JPG were  
18 involved in the screening of titles and abstracts. GR, JPG and EH are responsible for  
19 screening full texts. GR, JPG, EH and JBP will be responsible of data extraction. All authors  
20 read, provided feedback and approved the final manuscript.  
21  
22  
23

### 24 **Funding**

25  
26 This work was supported by Quebec Network on Nursing Intervention Research from a  
27 funding *Fonds de recherche du Québec Santé (FRQS)- Ministère de la santé et des services*  
28 *sociaux* (MSSS) (grant # 26674).  
29  
30

### 31 **Acknowledgements**

32  
33 GR is funded by Canadian Institutes of Health Research (CIHR), FRQS and Quebec SPOR-  
34 SUPPORT Unit for her doctoral studies. MPG holds the Tier 2 Canadian Research Chair on  
35 Technologies and Practices in Health and JC holds the Research Chair on Innovative Nursing  
36 Practices. Special thanks to Tripti Pande who has performed the search strategy, and Frédéric  
37 Bergeron, health information specialist at Université Laval, who gave precious advice in developing  
38 search strategy.  
39  
40

### 41 **Competing interests statement**

42  
43 The authors declare that they have no competing interests.  
44  
45

### 46 **Provenance and peer review**

47  
48 Not commissioned; externally peer reviewed.  
49  
50

### 51 **Data sharing statement**

52  
53 The authors will submit the results of the study for peer-review publication in a journal  
54 indexed in the international bibliographic database of biomedical information.  
55  
56  
57  
58  
59  
60

## Open Access

This is an Open Access article distributed in accordance with the Creative Commons Attribution Non Commercial (CC BY-NC 4.0) license, which permits others to distribute, remix, adapt, build upon this work non commercially, and license their derivative works on different terms, provided the original work is properly cited and the use is non-commercial. See: <http://creativecommons.org/licenses/by-nc/4.0/>

### Figure legends

Figure 1. Adapted version of the Nursing Care Performance Framework, which represents the range of possible outcomes for which data will be sought in this review of SRs.

### Figure 1 Caption

Adapted version of the Nursing Care Performance Framework - Range of possible outcomes of interest



## References

- 1 Hegney D, Tuckett A, Parker D, *et al.* Access to and support for continuing professional education amongst Queensland nurses: 2004 and 2007. *Nurse Educ Today* 2010;**30**:142–9. doi:10.1016/j.nedt.2009.06.015
- 2 Institute of Medicine. Future of Nursing : Leading Change, Advancing Health. Washington, DC: : The National Academies press 2011. <https://www.nap.edu/catalog/12956/the-future-of-nursing-leading-change-advancing-health> (accessed 25 Jun 2017).
- 3 Ross K, Barr J, Stevens J. Mandatory continuing professional development requirements: what does this mean for Australian nurses. *BMC Nurs* 2013;**12**:9. doi:10.1186/1472-6955-12-9
- 4 Gallagher L. Continuing education in nursing: A concept analysis. *Nurse Educ Today* 2007;**27**:466–73. doi:10.1016/j.nedt.2006.08.007
- 5 Moore DE, Green JS, Gallis HA. Achieving desired results and improved outcomes: integrating planning and assessment throughout learning activities. *J Contin Educ Health Prof* 2009;**29**:1–15. doi:10.1002/chp.20001
- 6 Billings D. Distance Education in Nursing: 25 years and going strong. *Comput Inform Nurs* 2007;**25**:121–3. doi:10.1097/01.NCN.0000270044.67905.4a
- 7 Horiuchi S, Yaju Y, Koyo M, *et al.* Evaluation of a web-based graduate continuing nursing education program in Japan: A randomized controlled trial. *Nurse Educ Today* 2009;**29**:140–9. doi:10.1016/j.nedt.2008.08.009
- 8 Shahhosseini Z, Hamzehgardeshi Z. The Facilitators and Barriers to Nurses' Participation in Continuing Education Programs: A Mixed Method Explanatory Sequential Study. *Glob J Health Sci* 2015;**7**:184. doi:10.5539/gjhs.v7n3p184
- 9 De Caro W, Marucci AR, Lancia L, *et al.* Case Study 2: E-Learning in Nursing Education in Academic Fields. In: *Umbrella Reviews: Evidence Synthesis with Overviews of Reviews and Meta-Epidemiologic Studies*. Switzerland: Biondi-Zoccai. G. 2016. 290–303.
- 10 Clark R, Mayer R. *e-Learning and the Science of Instruction: Proven Guidelines for Consumers and Designers of Multimedia Learning*. 4th ed. Hoboken, New Jersey: Wiley 2016.
- 11 Cook DA, Levinson AJ, Garside S, *et al.* Internet-Based Learning in the Health Professions: A Meta-analysis. *JAMA* 2008;**300**:1181–96. doi:10.1001/jama.300.10.1181
- 12 De Caro W, Marucci AR, Giordani M, *et al.* [E-learning and university nursing education: an overview of reviews]. *Prof Infirm* 2014;**67**:107. doi:10.7429/pi.2013.672107

- 1  
2  
3  
4  
5  
6  
7  
8  
9  
10  
11  
12  
13  
14  
15  
16  
17  
18  
19  
20  
21  
22  
23  
24  
25  
26  
27  
28  
29  
30  
31  
32  
33  
34  
35  
36  
37  
38  
39  
40  
41  
42  
43  
44  
45  
46  
47  
48  
49  
50  
51  
52  
53  
54  
55  
56  
57  
58  
59  
60
- 13 Lahti M, Hätönen H, Välimäki M. Impact of e-learning on nurses' and student nurses knowledge, skills, and satisfaction: A systematic review and meta-analysis. *Int J Nurs Stud* 2014;**51**:136–49. doi:10.1016/j.ijnurstu.2012.12.017
  - 14 Du S, Liu Z, Liu S, *et al.* Web-based distance learning for nurse education: a systematic review. *Int Nurs Rev* 2013;**60**:167–77. doi:10.1111/inr.12015
  - 15 Cook DA, Garside S, Levinson AJ, *et al.* What do we mean by web-based learning? A systematic review of the variability of interventions. *Med Educ* 2010;**44**:765–74. doi:10.1111/j.1365-2923.2010.03723.x
  - 16 Button D, Harrington A, Belan I. E-learning & information communication technology (ICT) in nursing education: A review of the literature. *Nurse Educ Today* 2014;**34**:1311–23. doi:10.1016/j.nedt.2013.05.002
  - 17 McVeigh H. Factors influencing the utilisation of e-learning in post-registration nursing students. *Nurse Educ Today* 2009;**29**:91–9. doi:10.1016/j.nedt.2008.07.004
  - 18 Contandriopoulos D. Some Thoughts on the Field of KTE. *Healthc Policy* 2012;**7**:29–37.
  - 19 Grant MJ, Booth A. A typology of reviews: an analysis of 14 review types and associated methodologies. *Health Inf Libr J* 2009;**26**:91–108. doi:10.1111/j.1471-1842.2009.00848.x
  - 20 Dubois C-A, D'Amour D, Pomey M-P, *et al.* Conceptualizing performance of nursing care as a prerequisite for better measurement: a systematic and interpretive review. *BMC Nurs* 2013;**12**:7. doi:10.1186/1472-6955-12-7
  - 21 Caird J, Sutcliffe K, Kwan I, *et al.* Mediating policy-relevant evidence at speed: are systematic reviews of systematic reviews a useful approach? *Evid Policy J Res Debate Pract* 2015;**11**:81–97. doi:10.1332/174426514X13988609036850
  - 22 D'Amour D, Dubois C-A, Déry J, *et al.* Measuring Actual Scope of Nursing Practice: A New Tool for Nurse Leaders. *J Nurs Adm* 2012;**42**:248–55. doi:10.1097/NNA.0b013e31824337f4
  - 23 Rouleau G, Gagnon M-P, Côté J, *et al.* Impact of Information and Communication Technologies on Nursing Care: Results of an Overview of Systematic Reviews. *J Med Internet Res* 2017;**19**:e122. doi:10.2196/jmir.6686
  - 24 Kirkpatrick DL. *Evaluating training programs : the four levels*. 1st ed. San Francisco: Berrett-Koehler 1994.
  - 25 Shamseer L, Moher D, Clarke M, *et al.* Preferred reporting items for systematic review and meta-analysis protocols (PRISMA-P) 2015: elaboration and explanation. *BMJ* 2015;**349**:g7647. doi:10.1136/bmj.g7647

- 1  
2  
3 26 Lunny C, Brennan SE, McDonald S, *et al.* Evidence map of studies evaluating methods  
4 for conducting, interpreting and reporting overviews of systematic reviews of  
5 interventions: rationale and design. *Syst Rev* 2016;**5**. doi:10.1186/s13643-015-0178-0  
6  
7  
8 27 Higgins J, Green S. *Cochrane Handbook for Systematic Reviews of Interventions.*  
9 *Version 5.1.0 [updated March 2011]*. 2011. <http://handbook.cochrane.org> (accessed 13  
10 Mar 2017).  
11  
12 28 Smith V, Devane D, Begley C, *et al.* Methodology in conducting a systematic review of  
13 systematic reviews of healthcare interventions. *BMC Med Res Methodol* 2011;**11**:15.  
14 doi:10.1186/1471-2288-11-15  
15  
16  
17 29 Becker L, Oxman A. Chapter 22: Overviews of reviews. *Cochrane Handb. Syst. Rev.*  
18 *Interv. Updat.* March 2011.  
19 2011. [http://handbook.cochrane.org/chapter\\_22/22\\_overviews\\_of\\_reviews.htm](http://handbook.cochrane.org/chapter_22/22_overviews_of_reviews.htm) (accessed  
20 13 Mar 2017).  
21  
22  
23 30 O'Connor D, Green S, Higgins JPT. Chapter 5: Defining the review question and  
24 developing criteria for including studies. In: Higgins JPT, Green S, eds. *Cochrane*  
25 *Handbook for Systematic Reviews of Interventions [updated March 2011]*. The Cochrane  
26 Collaboration 2011.  
27 [http://handbook.cochrane.org/chapter\\_5/5\\_defining\\_the\\_review\\_question\\_and\\_developin](http://handbook.cochrane.org/chapter_5/5_defining_the_review_question_and_developin)  
28 [g\\_criteria\\_for.htm](http://handbook.cochrane.org/chapter_5/5_defining_the_review_question_and_developin) (accessed 13 Mar 2017).  
29  
30  
31 31 Centre for Reviews and Dissemination. Systematic reviews: CRD's guidance for  
32 undertaking reviews in health care. 2009. <https://www.york.ac.uk/crd/guidance/> (accessed  
33 8 May 2017).  
34  
35  
36 32 Pluye P, Hong QN, Bush PL, *et al.* Opening-up the definition of systematic literature  
37 review: the plurality of worldviews, methodologies and methods for reviews and  
38 syntheses. *J Clin Epidemiol* 2016;**73**:2–5. doi:10.1016/j.jclinepi.2015.08.033  
39  
40  
41 33 Liberati A. The PRISMA Statement for reporting systematic reviews and meta-analyses  
42 of studies that evaluate health care interventions: explanation and elaboration. *PLOS Med*  
43 2009;**6**:e1000100. doi:10.1371/journal.pmed.1000100  
44  
45  
46 34 Shea B, Grimshaw J, Wells G, *et al.* Development of AMSTAR: a measurement tool to  
47 assess the methodological quality of systematic reviews. *BMC Med Res Methodol*  
48 2007;**7**:10. doi:10.1186/1471-2288-7-10  
49  
50  
51 35 Shea BJ, Hamel C, Wells GA, *et al.* AMSTAR is a reliable and valid measurement tool  
52 to assess the methodological quality of systematic reviews. *J Clin Epidemiol*  
53 2009;**62**:1013–20. doi:10.1016/j.jclinepi.2008.10.009  
54  
55  
56 36 Sharif MO, Janjua-Sharif FN, Sharif FNJ, *et al.* Systematic reviews explained:  
57 AMSTAR-how to tell the good from the bad and the ugly. *Oral Health Dent Manag*  
58 2013;**12**:9. doi:PMID: 23474576  
59  
60

- 1  
2  
3  
4  
5  
6  
7  
8  
9  
10  
11  
12  
13  
14  
15  
16  
17  
18  
19  
20  
21  
22  
23  
24  
25  
26  
27  
28  
29  
30  
31  
32  
33  
34  
35  
36  
37  
38  
39  
40  
41  
42  
43  
44  
45  
46  
47  
48  
49  
50  
51  
52  
53  
54  
55  
56  
57  
58  
59  
60
- 37 Weir M, Ryan R, Mayhew A, *et al.* The Rx for Change database: a first-in-class tool for optimal prescribing and medicines use. *Implement Sci* 2010;**5**:89. doi:doi: 10.1186/1748-5908-5-89
- 38 Whiting P, Savović J, Higgins JPT, *et al.* ROBIS: A new tool to assess risk of bias in systematic reviews was developed. *J Clin Epidemiol* 2016;**69**:225–34. doi:10.1016/j.jclinepi.2015.06.005
- 39 Schünemann HJ, Oxman AD, Gunn E V, *et al.* Interpreting results and drawing conclusions. In: *Cochrane Handbook for Systematic Reviews of Interventions. Version 5.1.0 [updated March 2011]*. Higgins, J., Green, S. 2014. <http://handbook.cochrane.org> (accessed 13 Mar 2017).
- 40 Guyatt GH, Oxman AD, Vist GE, *et al.* GRADE: an emerging consensus on rating quality of evidence and strength of recommendations. *BMJ* 2008;**336**:924–6. doi:10.1136/bmj.39489.470347.AD
- 41 Pollock M, Fernandes RM, Becker LA, *et al.* What guidance is available for researchers conducting overviews of reviews of healthcare interventions? A scoping review and qualitative metasummary. *Syst Rev* 2016;**5**:190. doi:10.1186/s13643-016-0367-5
- 42 Munn Z, Porritt K, Lockwood C, *et al.* Establishing confidence in the output of qualitative research synthesis: the ConQual approach. *BMC Med Res Methodol* 2014;**14**. doi:10.1186/1471-2288-14-108
- 43 Lewin S, Glenton C, Munthe-Kaas H, *et al.* Using Qualitative Evidence in Decision Making for Health and Social Interventions: An Approach to Assess Confidence in Findings from Qualitative Evidence Syntheses (GRADE-CERQual). *PLOS Med* 2015;**12**:e1001895. doi:10.1371/journal.pmed.1001895
- 44 Carroll C, Booth A. Quality assessment of qualitative evidence for systematic review and synthesis: Is it meaningful, and if so, how should it be performed? *Res Synth Methods* 2015;**6**:149–54. doi:10.1002/jrsm.1128
- 45 Pieper D, Antoine S-L, Mathes T, *et al.* Systematic review finds overlapping reviews were not mentioned in every other overview. *J Clin Epidemiol* 2014;**67**:368–75. doi:10.1016/j.jclinepi.2013.11.007
- 46 Studziński K, Tomasik T, Krzysztoń J, *et al.* Effect of using cardiovascular risk scoring in routine risk assessment in primary prevention of cardiovascular disease: protocol for an overview of systematic reviews. *BMJ Open* 2017;**7**:e014206. doi:10.1136/bmjopen-2016-014206
- 47 Frantzen KK, Feters MD. Meta-integration for synthesizing data in a systematic mixed studies review: insights from research on autism spectrum disorder. *Qual Quant* 2016;**50**:2251–77. doi:10.1007/s11135-015-0261-6

- 1  
2  
3 48 Pluye P, Hong QN. Combining the Power of Stories and the Power of Numbers: Mixed  
4 Methods Research and Mixed Studies Reviews. Published Online First: 18 March 2014.  
5 doi:10.1146/annurev-publhealth-032013-182440  
6  
7  
8 49 Creswell JW. *Research design : qualitative, quantitative, and mixed methods approaches*.  
9 4th ed. Thousand Oaks: : SAGE Publications 2014.  
10  
11 50 Aromataris E, Fernandez R, Godfrey CM, *et al*. Summarizing systematic reviews:  
12 methodological development, conduct and reporting of an umbrella review approach. *Int*  
13 *J Evid Based Healthc* 2015;**13**:132–40. doi:10.1097/XEB.0000000000000055  
14  
15  
16 51 Thomas J, Harden A. Methods for the thematic synthesis of qualitative research in  
17 systematic reviews. *BMC Med Res Methodol* 2008;**8**:45. doi:10.1186/1471-2288-8-45  
18  
19  
20 52 Dubois C-A, D'Amour D, Brault I, *et al*. Indicateurs prioritaires pour évaluer la  
21 contribution infirmière à la qualité des soins : revue systématique des écrits. Montréal,  
22 CA: 2015.  
23  
24 53 George PP, Papachristou N, Belisario JM, *et al*. Online eLearning for undergraduates in  
25 health professions: A systematic review of the impact on knowledge, skills, attitudes and  
26 satisfaction. *J Glob Health* 2014;**4**. doi:10.7189/jogh.04.010406  
27  
28  
29 54 Phillips JL, Piza M, Ingham J. Continuing professional development programmes for  
30 rural nurses involved in palliative care delivery: An integrative review. *Nurse Educ*  
31 *Today* 2012;**32**:385–92. doi:10.1016/j.nedt.2011.05.005  
32  
33  
34  
35  
36  
37  
38  
39  
40  
41  
42  
43  
44  
45  
46  
47  
48  
49  
50  
51  
52  
53  
54  
55  
56  
57  
58  
59  
60

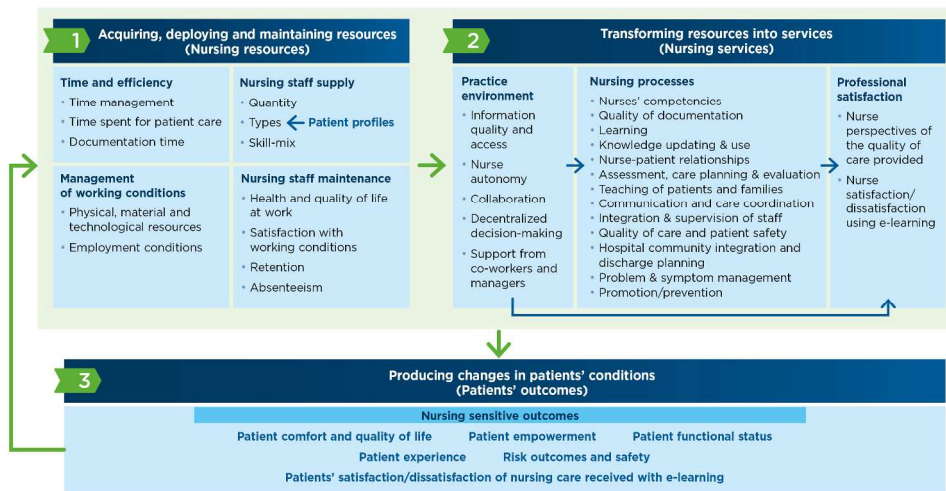

Figure 1. Adapted version of the Nursing Care Performance Framework - Range of possible outcomes of interest

269x135mm (300 x 300 DPI)

review only

## Appendix 1: PRISMA-P (Preferred Reporting Items for Systematic review and Meta-Analysis Protocols) 2015 checklist: recommended items to address in a systematic review protocol

**Title: Effects of e-learning interventions in continuing education context on nursing care: an overview of systematic mixed studies reviews (protocol)**

| Section and topic                 | Item No | Checklist item                                                                                                                                                                                                                | Reported on page # |
|-----------------------------------|---------|-------------------------------------------------------------------------------------------------------------------------------------------------------------------------------------------------------------------------------|--------------------|
| <b>ADMINISTRATIVE INFORMATION</b> |         |                                                                                                                                                                                                                               |                    |
| Title:                            |         |                                                                                                                                                                                                                               |                    |
| Identification                    | 1a      | Identify the report as a protocol of a systematic review                                                                                                                                                                      | 1                  |
| Update                            | 1b      | If the protocol is for an update of a previous systematic review, identify as such                                                                                                                                            | n/a                |
| Registration                      | 2       | If registered, provide the name of the registry (such as PROSPERO) and registration number                                                                                                                                    | 9                  |
| Authors:                          |         |                                                                                                                                                                                                                               |                    |
| Contact                           | 3a      | Provide name, institutional affiliation, e-mail address of all protocol authors; provide physical mailing address of corresponding author                                                                                     | 1                  |
| Contributions                     | 3b      | Describe contributions of protocol authors and identify the guarantor of the review                                                                                                                                           | 19                 |
| Amendments                        | 4       | If the protocol represents an amendment of a previously completed or published protocol, identify as such and list changes; otherwise, state plan for documenting important protocol amendments                               | n/a                |
| Support:                          |         |                                                                                                                                                                                                                               |                    |
| Sources                           | 5a      | Indicate sources of financial or other support for the review                                                                                                                                                                 | 19                 |
| Sponsor                           | 5b      | Provide name for the review funder and/or sponsor                                                                                                                                                                             | n/a                |
| Role of sponsor or funder         | 5c      | Describe roles of funder(s), sponsor(s), and/or institution(s), if any, in developing the protocol                                                                                                                            | n/a                |
| <b>INTRODUCTION</b>               |         |                                                                                                                                                                                                                               |                    |
| Rationale                         | 6       | Describe the rationale for the review in the context of what is already known                                                                                                                                                 | 5-6                |
| Objectives                        | 7       | Provide an explicit statement of the question(s) the review will address with reference to participants, interventions, comparators, and outcomes (PICO)                                                                      | 5-6                |
| <b>METHODS</b>                    |         |                                                                                                                                                                                                                               |                    |
| Eligibility criteria              | 8       | Specify the study characteristics (such as PICO, study design, setting, time frame) and report characteristics (such as years considered, language, publication status) to be used as criteria for eligibility for the review | 10-12              |
| Information sources               | 9       | Describe all intended information sources (such as electronic databases, contact with study authors, trial registers or other grey                                                                                            | 12                 |

|                                    |     |                                                                                                                                                                                                                                                  |            |
|------------------------------------|-----|--------------------------------------------------------------------------------------------------------------------------------------------------------------------------------------------------------------------------------------------------|------------|
|                                    |     | literature sources) with planned dates of coverage                                                                                                                                                                                               |            |
| Search strategy                    | 10  | Present draft of search strategy to be used for at least one electronic database, including planned limits, such that it could be repeated                                                                                                       | Appendix 3 |
| Study records:                     |     |                                                                                                                                                                                                                                                  |            |
| Data management                    | 11a | Describe the mechanism(s) that will be used to manage records and data throughout the review                                                                                                                                                     | 13         |
| Selection process                  | 11b | State the process that will be used for selecting studies (such as two independent reviewers) through each phase of the review (that is, screening, eligibility and inclusion in meta-analysis)                                                  | 13         |
| Data collection process            | 11c | Describe planned method of extracting data from reports (such as piloting forms, done independently, in duplicate), any processes for obtaining and confirming data from investigators                                                           | 13-14      |
| Data items                         | 12  | List and define all variables for which data will be sought (such as PICO items, funding sources), any pre-planned data assumptions and simplifications                                                                                          | 13-14      |
| Outcomes and prioritization        | 13  | List and define all outcomes for which data will be sought, including prioritization of main and additional outcomes, with rationale                                                                                                             | Appendix 2 |
| Risk of bias in individual studies | 14  | Describe anticipated methods for assessing risk of bias of individual studies, including whether this will be done at the outcome or study level, or both; state how this information will be used in data synthesis                             | 15-17      |
| Data synthesis                     | 15a | Describe criteria under which study data will be quantitatively synthesised                                                                                                                                                                      | -          |
|                                    | 15b | If data are appropriate for quantitative synthesis, describe planned summary measures, methods of handling data and methods of combining data from studies, including any planned exploration of consistency (such as $I^2$ , Kendall's $\tau$ ) | -          |
|                                    | 15c | Describe any proposed additional analyses (such as sensitivity or subgroup analyses, meta-regression)                                                                                                                                            | -          |
|                                    | 15d | If quantitative synthesis is not appropriate, describe the type of summary planned                                                                                                                                                               | 17-18      |
| Meta-bias(es)                      | 16  | Specify any planned assessment of meta-bias(es) (such as publication bias across studies, selective reporting within studies)                                                                                                                    | n/a        |
| Confidence in cumulative evidence  | 17  | Describe how the strength of the body of evidence will be assessed (such as GRADE)                                                                                                                                                               | 16-17      |

**\* It is strongly recommended that this checklist be read in conjunction with the PRISMA-P Explanation and Elaboration (cite when available) for important clarification on the items. Amendments to a review protocol should be tracked and dated. The copyright for PRISMA-P (including checklist) is held by the PRISMA-P Group and is distributed under a Creative Commons Attribution Licence 4.0.**

*From: Shamseer L, Moher D, Clarke M, Ghersi D, Liberati A, Petticrew M, Shekelle P, Stewart L, PRISMA-P Group. Preferred reporting items for systematic review and meta-analysis protocols (PRISMA-P) 2015: elaboration and explanation. BMJ. 2015 Jan 2;349(jan02 1):g7647.*



## Appendix 2: Definitions and/or examples of components regarding outcomes of interest

| Nursing subsystems               | Dimensions/Indicators                                | Definition and/or examples of components                                                                                                                                                                                                     | References                    |
|----------------------------------|------------------------------------------------------|----------------------------------------------------------------------------------------------------------------------------------------------------------------------------------------------------------------------------------------------|-------------------------------|
| Nursing resources (structure)    | Nursing staff supply                                 | The effectiveness of diverse activities that govern nursing staff intake (planning, recruitment, selection) and deployment; must ensure an adequate balance with the demand for nursing services.                                            | [1]Dubois et al. 2013         |
|                                  | <i>Quantity</i>                                      | Total number of workers in defined occupational groups; nurse-patient ratios.                                                                                                                                                                | [2]Dubois et al. 2009         |
|                                  | <i>Quality</i>                                       | Professional backgrounds, skills, job title, qualifications, expertise and experience in order to achieve optimal patient care.                                                                                                              | [1,2]Dubois et al. 2013; 2009 |
|                                  | <i>Skill mix</i>                                     | Role enhancement (e.g expanding scope of practice, developing new competencies and assuming new responsibilities), role enlargement (e.g diversification and expansion of nurses' skill repertoires), role substitution and role delegation. | [2]Dubois et al. 2009         |
|                                  | Time and efficiency                                  | Time devoted to perform general and specific tasks related to direct or indirect care.                                                                                                                                                       | [3]Rouleau et al. 2017        |
|                                  | <i>Time management</i>                               | Time devoted to perform a task (in general). For instance, using e-learning intervention could be "time consuming" or "time saving".                                                                                                         | [3]Rouleau et al. 2017        |
|                                  | <i>Time spent with patient care</i>                  | Time allocated to patient care discussed with the use of e-learning interventions.                                                                                                                                                           | [3]Rouleau et al. 2017        |
|                                  | <i>Documentation time</i>                            | Time allocated to document nurses' activities.                                                                                                                                                                                               | [3]Rouleau et al. 2017        |
| Management of working conditions | Depends on resources and employment characteristics. | [1]Dubois et al. 2013                                                                                                                                                                                                                        |                               |

|                               |                                                       |                                                                                                                                                                                                                                                             |                        |
|-------------------------------|-------------------------------------------------------|-------------------------------------------------------------------------------------------------------------------------------------------------------------------------------------------------------------------------------------------------------------|------------------------|
| Nursing resources (structure) | <i>Physical, material and technological resources</i> | Different types of material resources (e.g. physical facilities, technologies, financial resources, organizational configurations) that are required to support nurses in the performance of their roles.                                                   | [1]Dubois et al. 2013  |
|                               | <i>Employment conditions</i>                          | Employment characteristics such as workload, scheduling, overtime, employment status, labour relationships.                                                                                                                                                 | [1]Dubois et al. 2013  |
|                               | Nursing staff maintenance                             | Depends on various factors such as quality of life at work and satisfaction or dissatisfaction with working conditions.                                                                                                                                     | [1]Dubois et al. 2013  |
|                               | <i>Health and quality of life at work</i>             | E.g. Work-related accidents, illnesses, injuries                                                                                                                                                                                                            | [1]Dubois et al. 2013  |
|                               | <i>Satisfaction with working conditions</i>           | E.g. Job satisfaction or dissatisfaction related to working conditions                                                                                                                                                                                      | [1]Dubois et al. 2013  |
|                               | <i>Absenteeism</i>                                    | Can be caused by many factors                                                                                                                                                                                                                               | [1]Dubois et al.2013   |
|                               | <i>Retention/Turnover</i>                             | Capacity to recruit new nurses and retain those already employed.                                                                                                                                                                                           | [1]Dubois et al. 2013  |
| Nursing services              | Nurse practice environment                            | E-learning can be seen as way to support nursing work and create a professional practice environment for nurses.                                                                                                                                            | [4]Lake, 2002          |
|                               | <i>Information quality and access</i>                 | The use of e-learning interventions could improve or alter information quality and access regarding for example patient issues, clinical data, medication information/profile, and other information (policies, guidelines, drug resources, patient files). | [3]Rouleau et al. 2017 |
|                               | <i>Nurse autonomy in their role</i>                   | Shared governance, nursing responsibility, authority, accountability.                                                                                                                                                                                       | [5]Currie et al. 2005  |
|                               | <i>Intra and interprofessional collaboration</i>      | Communication and collaboration among nursing staff; collegiality between nurses and other professional groups.                                                                                                                                             | [1]Dubois et al. 2013  |
|                               | <i>Decentralization of decision-making</i>            | Decentralization of decision-making with responsibilities for nursing services devoted to the nursing unit.                                                                                                                                                 | [1]Dubois et al. 2013  |
|                               | <i>Support from co-workers and managers</i>           | E.g. A supervisory staff that is supportive (or not) of the nurses.                                                                                                                                                                                         | [4]Lake, 2002          |

|                  |                                                 |                                                                                                                                                                                                                                                                                                                                                                                                                                                                                                      |                        |
|------------------|-------------------------------------------------|------------------------------------------------------------------------------------------------------------------------------------------------------------------------------------------------------------------------------------------------------------------------------------------------------------------------------------------------------------------------------------------------------------------------------------------------------------------------------------------------------|------------------------|
| Nursing services | Nursing processes                               | Are linked to what nurses do (nursing interventions).                                                                                                                                                                                                                                                                                                                                                                                                                                                | [1]Dubois et al. 2013  |
|                  | <i>Quality of documentation</i>                 | The extent to which e-learning interventions could improve or alter the quality of documentation regarding, for example, patient care and nursing activities.                                                                                                                                                                                                                                                                                                                                        | [3]Rouleau et al. 2017 |
|                  | <i>Learning</i>                                 | Acquisition of declarative (knows) and procedural knowledge (knows how), described in a general way.                                                                                                                                                                                                                                                                                                                                                                                                 | [5]Moore et al. 2009   |
|                  | <i>Nurses competencies and skills</i>           | E.g. Decision support/decision-making, observation skills, clinical judgment, critical thinking.                                                                                                                                                                                                                                                                                                                                                                                                     | [3]Rouleau et al. 2017 |
|                  | <i>Nurse-patient relationship</i>               | E.g. The use of e-learning interventions to create pathways for communication, new types of bonds between nurses and patients, establish trust, create a sense of connection.                                                                                                                                                                                                                                                                                                                        | [3]Rouleau et al. 2017 |
|                  | <i>Assessment, care planning and evaluation</i> | Assess patient's physical and mental condition, taking biopsychosocial aspects into consideration. Evaluate and update, in writing, information about the patient's condition and the care provided in the therapeutic nursing plan, nurses' notes, etc. Plan interventions using healthcare assessment tools (pain scale, wound assessment tool). Involve the patient and the patient's family in care planning. The nurse participates in designing, applying, and updating patient care programs. | [6]D'Amour et al. 2012 |
|                  | <i>Teaching of patients and families</i>        | Assess the specific information and education needs of each patient and his/her family. Verify that the patient and family have understood the teaching provided. Use teaching strategies that are adapted to each patient and family in accordance with the patient's level of autonomy. Check the quality of patient education provided on the unit.                                                                                                                                               | [6]D'Amour et al. 2012 |

|                  |                                             |                                                                                                                                                                                                                                                                                                                                                                                                                                                                     |                                               |
|------------------|---------------------------------------------|---------------------------------------------------------------------------------------------------------------------------------------------------------------------------------------------------------------------------------------------------------------------------------------------------------------------------------------------------------------------------------------------------------------------------------------------------------------------|-----------------------------------------------|
| Nursing services | <i>Communication and care coordination</i>  | Communicate to members of the team all information that could affect the coordination of care.<br>Coordinate the work of the nursing team to meet the needs of the patient and family as well as the interventions of the interprofessional team. Convey all relevant information to healthcare professionals in other institutions in order to ensure continuity of care. Participate in interprofessional team meetings or activities. Ensure continuity of care. | [6]D'Amour et al. 2012                        |
|                  | <i>Knowledge updating and utilization</i>   | Keep knowledge up-to-date. Improve nursing practice based on new knowledge derived from best practices and research in nursing science or in health. Knowledge exchange with the nursing team knowledge emerging from research. Different types of knowledge exist, such as declarative knowledge (know), procedural knowledge (know how to do something) and competence (know how).                                                                                | [5,6] D'Amour et al. 2012; Moore et al., 2009 |
|                  | <i>Integration and supervision of staff</i> | Participate in identifying in-service education needs in workplace. Being involved in the orientation and training of nursing students or of newly hired staff. Act as a mentor or educator for newly hired staff. Develop and conduct training activities for the care team, in accordance with nurses skills.                                                                                                                                                     | [6]D'Amour et al. 2012                        |
|                  | <i>Quality of care and patient safety</i>   | Report clinical situations in which deficiencies in quality and safety of care are identified, and propose courses of action to improve them. Improve the quality and safety of care by updating practices. Be a part in the evaluation of quality and safety of care and in developing nursing practice.                                                                                                                                                           | [6]D'Amour et al. 2012                        |
|                  | <i>Problem and symptoms management</i>      | Nursing interventions intended to have effect on symptoms management, such as pain and fatigue (e.g. evaluation, use of non pharmacological approaches, patients' education)                                                                                                                                                                                                                                                                                        | [7]Dubois et al. 2015                         |

|                  |                                                                |                                                                                                                                                                                                                                                                                                                                                                                      |                        |
|------------------|----------------------------------------------------------------|--------------------------------------------------------------------------------------------------------------------------------------------------------------------------------------------------------------------------------------------------------------------------------------------------------------------------------------------------------------------------------------|------------------------|
| Nursing services | <i>Promotion/prevention</i>                                    | Nursing interventions intended to promote health-related behaviours in order to prevent disease or the apparition of complications. For example: interventions for preventing falls among elderly people, for preventing pressure ulcers, vaccination, smoking cessation interventions, etc.                                                                                         | [7]Dubois et al. 2015  |
|                  | <i>Hospital community integration and discharge planning</i>   | Care organization, resources planning depending of patients' health status when they leave the hospitals                                                                                                                                                                                                                                                                             | [7]Dubois et al. 2015  |
|                  | Professional satisfaction                                      | Resulting from nursing processes and from specific aspects that influence their perception of their ability to accomplish their daily assignments and enjoy the work itself.                                                                                                                                                                                                         | [1]Dubois et al. 2013  |
|                  | <i>Nurses perspectives of the quality of care provided</i>     | According the nurses' perspectives, the way they evaluate the quality of care they provided. For example: improvement (or not) of quality of care and patient safety, nurses' perceptions that technologies reduce medication errors and improve medication administration processes, the provision of comprehensive and adaptive care related to the patients' needs.               | [3]Rouleau et al. 2017 |
|                  | <i>Nurses satisfaction or dissatisfaction using e-learning</i> | Overall acceptance of e-learning interventions, and their satisfaction with them described in general way (e.g. their degree of satisfaction or dissatisfaction). Other elements to consider: system navigability (e.g. complexity, ease of use, user-friendliness, and flexibility), nurses' attitudes, concerns about patients' privacy, and perceived benefits or inconveniences. | [3]Rouleau et al. 2017 |
|                  | Nursing sensitive outcomes                                     | The desirable end result of the interactions between nursing resources (structure) and nursing services (processes) is to improve patients' conditions.                                                                                                                                                                                                                              | [1]Dubois et al. 2013  |
|                  | <i>Patient experience</i>                                      | Patients' perspectives about care received, for example, in terms on care continuity, engagement in care, respect of their preferences, quality of communication with healthcare professionals, etc.                                                                                                                                                                                 | [1]Dubois et al. 2013  |

|                              |                                                                    |                                                                                                                                                                                                                                                                                                                                                                                                                         |                        |
|------------------------------|--------------------------------------------------------------------|-------------------------------------------------------------------------------------------------------------------------------------------------------------------------------------------------------------------------------------------------------------------------------------------------------------------------------------------------------------------------------------------------------------------------|------------------------|
| Change in patients' outcomes | <i>Patient comfort and quality of life related to care</i>         | Nursing system performance reflects the extent to which patients' needs in relation to personal hygiene, nutrition, management of symptoms (pain, dyspnea), and continence are met, unnecessary interventions (physical or chemical restraints, nasogastric tubes, prolonged use of urinary catheters) are avoided, and patients' respect is ensured throughout the episode of care.                                    | [1]Dubois et al. 2013  |
|                              | <i>Patient empowerment</i>                                         | Ability to achieve appropriate self-care. Adoption of health-promoting behaviours.                                                                                                                                                                                                                                                                                                                                      | [1]Dubois et al. 2013  |
|                              | <i>Patient functional status</i>                                   | This category of indicators covers essential end results and benefits that reflect what happens in people's lives as a result of nursing care interventions. In the models examined, these indicators encompass diverse aspects of patients' general functional status and conditions, including physical, psychosocial and cognitive status, as well as recovery of initial health status and nutritional status.      | [1]Dubois et al. 2013  |
|                              | <i>Risk outcomes and safety</i>                                    | Safety-related outcomes considered potentially sensitive to nursing: patient falls, injuries, medication errors, pulmonary infections, pressure ulcers, urinary tract infections, intravenous infections, abuses, and failure to rescue.                                                                                                                                                                                | [1]Dubois et al. 2013  |
|                              | <i>Patient satisfaction or dissatisfaction of using e-learning</i> | Patient results indicated their degree of satisfaction/dissatisfaction with e-learning interventions, their acceptance, acceptability, and receptiveness of their usage of interventions. Usefulness (or uselessness), perceived and actual benefits/advantages, such as accessibility and flexibility, ease of use, usability, complexity, level of confidence in using e-learning interventions, the confidentiality. | [3]Rouleau et al. 2017 |

## References

- 1 Dubois C-A, D'Amour D, Pomey M-P, *et al.* Conceptualizing performance of nursing care as a prerequisite for better measurement: a systematic and interpretive review. *BMC Nurs* 2013;**12**:7. doi:10.1186/1472-6955-12-7
- 2 Dubois C-A, Singh D. From staff-mix to skill-mix and beyond: towards a systemic approach to health workforce management. *Hum Resour Health* 2009;**7**:87. doi:10.1186/1478-4491-7-87
- 3 Rouleau G, Gagnon M-P, Côté J, *et al.* Impact of Information and Communication Technologies on Nursing Care: Results of an Overview of Systematic Reviews. *J Med Internet Res* 2017;**19**:e122. doi:10.2196/jmir.6686
- 4 Lake ET. Development of the practice environment scale of the nursing work index<sup>†‡</sup>. *Res Nurs Health* 2002;**25**:176–88. doi:10.1002/nur.10032
- 5 Moore DE, Green JS, Gallis HA. Achieving desired results and improved outcomes: integrating planning and assessment throughout learning activities. *J Contin Educ Health Prof* 2009;**29**:1–15. doi:10.1002/chp.20001
- 6 D'Amour D, Dubois C-A, Déry J, *et al.* Measuring Actual Scope of Nursing Practice: A New Tool for Nurse Leaders. *J Nurs Adm* 2012;**42**:248–55. doi:10.1097/NNA.0b013e31824337f4
- 7 Dubois C-A, D'Amour D, Brault I, *et al.* Indicateurs prioritaires pour évaluer la contribution infirmière à la qualité des soins : revue systématique des écrits. Montréal, CA: 2015.

### Appendix 3: Search strategy planned for PubMed

From January 1, 2006 to January 26, 2017

“registered nurse” [TIAB] OR nurse’s role [MeSH] OR nursing practice [TIAB] OR nurs\* [TIAB] OR nursing [MeSH] OR “nursing diagnostics” [MeSH] or nursing care [MeSH] or Evidence-based nursing [MeSH] or “advanced practice nursing” [MeSH] or “nursing assessment” [MeSH] OR “practice patterns, nurses” [MeSH] OR “education, nursing, continuing” [MeSH] OR “health care profession\*” [TIAB] OR “health profession” [TIAB] OR “health-care professional” [TIAB] OR “healthcare education” [TIAB]

AND

“mLearning” [TIAB] OR “m-learning” [TIAB] OR “mobile learning” [TIAB] or “web-based learning” [TIAB] or “web based learning” [TIAB] OR “internet based learning” [TIAB] OR “internet-based learning” [TIAB] or “eLearning” [TIAB] or “e-learning” [TIAB] or “electronic learning” [TIAB] OR “health, education” [MeSH] OR “eLearning in health” [TIAB] or “multi-media learning tool\*” [TIAB] or “multimedia learning tool\*” [TIAB] OR “multimedia instruction” [TIAB] OR “interactive learning” [TIAB] OR “online learning” [TIAB] or “online discussion board\*” [TIAB] OR “exchange portal” [TIAB] or electronic mail [MeSH] OR smartphone [MeSH] OR cellular phone [MeSH] OR “computers, handheld” [MeSH] “internet-mediated videoconferencing” [TIAB] or “virtual learning environment” [TIAB] OR “learning management system” [TIAB] OR “education, distance” [MeSH] OR “distance learning” [TIAB] OR “distance education” [TIAB] OR Self Directed Learning [MeSH] OR “blended learning” [TIAB]

OR

“Life-long learning” [TIAB] OR “lifelong learning” [TIAB] OR “continuing, education” [MeSH] OR “continuing professional development” [TIAB] OR “education, professional” [MeSH] OR “Professional Development” [MeSH]

AND

(systematic[sb] OR meta-analysis[pt] OR meta-analysis as topic[mh] OR meta-analysis[mh] OR meta analy\*[tw] OR metanaly\*[tw] OR metaanaly\*[tw] OR metanaly\*[tw] OR integrative research[tiab] OR integrative review\*[tiab] OR integrative overview\*[tiab] OR research integration\*[tiab] OR research overview\*[tiab] OR collaborative review\*[tiab] OR collaborative overview\*[tiab] OR systematic review\*[tiab] OR technology assessment\*[tiab] OR technology overview\*[tiab] OR “Technology Assessment, Biomedical” [mh] OR HTA[tiab] OR HTAs[tiab] OR comparative efficacy[tiab] OR comparative effectiveness[tiab] OR outcomes research[tiab] OR indirect comparison\*[tiab] OR ((indirect treatment[tiab] OR mixed-



1  
2  
3  
4 treatment[tiab]) AND comparison\*[tiab]) OR Embase\*[tiab] OR Cinahl\*[tiab] OR  
5 systematic overview\*[tiab] OR methodological overview\*[tiab] OR methodologic  
6 overview\*[tiab] OR methodological review\*[tiab] OR methodologic review\*[tiab] OR  
7 quantitative review\*[tiab] OR quantitative overview\*[tiab] OR quantitative  
8 syntheses\*[tiab] OR pooled analy\*[tiab] OR Cochrane[tiab] OR Medline[tiab] OR  
9 Pubmed[tiab] OR Medlars[tiab] OR handsearch\*[tiab] OR hand search\*[tiab] OR  
10 meta-regression\*[tiab] OR metaregression\*[tiab] OR data syntheses\*[tiab] OR data  
11 extraction[tiab] OR data abstraction\*[tiab] OR mantel haenszel[tiab] OR peto[tiab] OR  
12 der-simonian[tiab] OR dersimonian[tiab] OR fixed effect\*[tiab] OR "Cochrane  
13 Database Syst Rev"[Journal: \_\_jrid21711] OR "health technology assessment  
14 winchester, england"[Journal] OR "Evid Rep Technol Assess (Full Rep)"[Journal] OR  
15 "Evid Rep Technol Assess (Summ)"[Journal] OR "Int J Technol Assess Health  
16 Care"[Journal] OR "GMS Health Technol Assess"[Journal] OR "Health Technol  
17 Assess (Rockv)"[Journal] OR "Health Technol Assess Rep"[Journal])  
18  
19  
20  
21  
22  
23  
24  
25  
26  
27  
28  
29  
30  
31  
32  
33  
34  
35  
36  
37  
38  
39  
40  
41  
42  
43  
44  
45  
46  
47  
48  
49  
50  
51  
52  
53  
54  
55  
56  
57  
58  
59  
60

peer review only
