# Supplementary material for: Effects of e-learning in a continuing education context on nursing care: a review of systematic qualitative, quantitative and mixed studies reviews (protocol)
Source: PubMed Central journal article supplement — BMJ Open. 2017 Oct 16;7(10):e018441. doi: 10.1136/bmjopen-2017-018441 (PMC5652594; doi:10.1136/bmjopen-2017-018441), 2017-10-16
Supplement: bmjopen-2017-018441supp003.pdf [file bmjopen-2017-018441supp003.pdf]

### Appendix 3: Search strategy planned for PubMed

From January 1, 2006 to January 26, 2017

“registered nurse” [TIAB] OR nurse’s role [MeSH] OR nursing practice [TIAB] OR nurs\* [TIAB] OR nursing [MeSH] OR “nursing diagnostics” [MeSH] or nursing care [MeSH] or Evidence-based nursing [MeSH] or “advanced practice nursing” [MeSH] or “nursing assessment” [MeSH] OR “practice patterns, nurses” [MeSH] OR “education, nursing, continuing” [MeSH] OR “health care profession\*” [TIAB] OR “health profession” [TIAB] OR “health-care professional” [TIAB] OR “healthcare education” [TIAB]

AND

“mLearning” [TIAB] OR “m-learning” [TIAB] OR “mobile learning” [TIAB] or “web-based learning” [TIAB] or “web based learning” [TIAB] OR “internet based learning” [TIAB] OR “internet-based learning” [TIAB] or “eLearning” [TIAB] or “e-learning” [TIAB] or “electronic learning” [TIAB] OR “health, education” [MeSH] OR “eLearning in health” [TIAB] or “multi-media learning tool\*” [TIAB] or “multimedia learning tool\*” [TIAB] OR “multimedia instruction” [TIAB] OR “interactive learning” [TIAB] OR “online learning” [TIAB] or “online discussion board\*” [TIAB] OR “exchange portal” [TIAB] or electronic mail [MeSH] OR smartphone [MeSH] OR cellular phone [MeSH] OR “computers, handheld” [MeSH] “internet-mediated videoconferencing” [TIAB] or “virtual learning environment” [TIAB] OR “learning management system” [TIAB] OR “education, distance” [MeSH] OR “distance learning” [TIAB] OR “distance education” [TIAB] OR Self Directed Learning [MeSH] OR “blended learning” [TIAB]

OR

“Life-long learning” [TIAB] OR “lifelong learning” [TIAB] OR “continuing, education” [MeSH] OR “continuing professional development” [TIAB] OR “education, professional” [MeSH] OR “Professional Development” [MeSH]

AND

(systematic[sb] OR meta-analysis[pt] OR meta-analysis as topic[mh] OR meta-analysis[mh] OR meta analy\*[tw] OR metanaly\*[tw] OR metaanaly\*[tw] OR metanaly\*[tw] OR integrative research[tiab] OR integrative review\*[tiab] OR integrative overview\*[tiab] OR research integration\*[tiab] OR research overview\*[tiab] OR collaborative review\*[tiab] OR collaborative overview\*[tiab] OR systematic review\*[tiab] OR technology assessment\*[tiab] OR technology overview\*[tiab] OR “Technology Assessment, Biomedical” [mh] OR HTA[tiab] OR HTAs[tiab] OR comparative efficacy[tiab] OR comparative effectiveness[tiab] OR outcomes research[tiab] OR indirect comparison\*[tiab] OR ((indirect treatment[tiab] OR mixed-

treatment[tiab]) AND comparison\*[tiab]) OR Embase\*[tiab] OR Cinahl\*[tiab] OR systematic overview\*[tiab] OR methodological overview\*[tiab] OR methodologic overview\*[tiab] OR methodological review\*[tiab] OR methodologic review\*[tiab] OR quantitative review\*[tiab] OR quantitative overview\*[tiab] OR quantitative syntheses\*[tiab] OR pooled analy\*[tiab] OR Cochrane[tiab] OR Medline[tiab] OR Pubmed[tiab] OR Medlars[tiab] OR handsearch\*[tiab] OR hand search\*[tiab] OR meta-regression\*[tiab] OR metaregression\*[tiab] OR data syntheses\*[tiab] OR data extraction[tiab] OR data abstraction\*[tiab] OR mantel haenszel[tiab] OR peto[tiab] OR der-simonian[tiab] OR dersimonian[tiab] OR fixed effect\*[tiab] OR "Cochrane Database Syst Rev"[Journal: \_\_jrid21711] OR "health technology assessment winchester, england"[Journal] OR "Evid Rep Technol Assess (Full Rep)"[Journal] OR "Evid Rep Technol Assess (Summ)"[Journal] OR "Int J Technol Assess Health Care"[Journal] OR "GMS Health Technol Assess"[Journal] OR "Health Technol Assess (Rockv)"[Journal] OR "Health Technol Assess Rep"[Journal])
